# Supplementary material
Source: ML conference proceedings conference paper supplement (https://proceedings.neurips.cc/paper_files/paper/2022/hash/b0ae046e198a5e43141519868a959c74-Abstract.html)
Supplement: Supplementary file 1 [file b0ae046e198a5e43141519868a959c74-Supplemental-Conference.pdf]

## A Notations

In this section, we define notations, many of which are standard, that are useful in the proofs.

We denote by  $\mathbb{N}$  the set of all natural numbers, including 0, and by  $\mathbb{N}^*$  the set  $\mathbb{N}$  without 0. We denote by  $\mathbb{Z}$  the set of all integers. For any  $a, b \in \mathbb{Z}$ , we denote by  $\llbracket a, b \rrbracket$  the set of all integers  $k \in \mathbb{Z}$  satisfying  $a \leq k \leq b$ . For any finite set  $A$ , we denote by  $|A|$  the cardinal of  $A$ .

For  $n, N \in \mathbb{N}^*$ , we denote by  $\mathbb{R}^N$  the  $N$ -dimensional real vector space and by  $\mathbb{R}^{n \times N}$  the vector space of real matrices with  $n$  lines and  $N$  columns. For a vector  $x = (x_1, \dots, x_N)^T \in \mathbb{R}^N$ , we use the norm  $\|x\|_\infty = \max_{i \in \llbracket 1, N \rrbracket} |x_i|$ . For  $x \in \mathbb{R}^N$  and  $r > 0$ , we denote  $B_\infty(x, r) = \{y \in \mathbb{R}^N, \|y - x\|_\infty < r\}$ .

For any vector  $x = (x_1, \dots, x_N)^T \in \mathbb{R}^N$ , we define  $\text{sign}(x) = (\text{sign}(x_1), \dots, \text{sign}(x_N))^T \in \{-1, 0, 1\}^N$  as the vector whose  $i^{\text{th}}$  component is equal to

$$\text{sign}(x_i) = \begin{cases} 1 & \text{if } x_i > 0 \\ 0 & \text{if } x_i = 0 \\ -1 & \text{if } x_i < 0. \end{cases}$$

For any matrix  $M \in \mathbb{R}^{n \times N}$ , for all  $i \in \llbracket 1, n \rrbracket$ , we denote by  $M_{i,:}$  the  $i^{\text{th}}$  line of  $M$ . The vector  $M_{i,:}$  is a line vector whose  $j^{\text{th}}$  component is  $M_{i,j}$ . Similarly, for  $j \in \llbracket 1, N \rrbracket$ , we denote by  $M_{:,j}$  the  $j^{\text{th}}$  column of  $M$ , which is the column vector whose  $i^{\text{th}}$  component is  $M_{i,j}$ . For any matrix  $M \in \mathbb{R}^{n \times N}$ , we denote by  $M^T \in \mathbb{R}^{N \times n}$  the transpose matrix of  $M$ .

We denote by  $\text{Id}_N$  the  $N \times N$  identity matrix and by  $\mathbf{1}_N$  the vector  $(1, 1, \dots, 1)^T \in \mathbb{R}^N$ . If  $\lambda \in \mathbb{R}^N$  is a vector of size  $N$ , for some  $N \in \mathbb{N}^*$ , we denote by  $\text{Diag}(\lambda)$  the  $N \times N$  matrix defined by:

$$\text{Diag}(\lambda)_{i,j} = \begin{cases} \lambda_i & \text{if } i = j \\ 0 & \text{otherwise.} \end{cases}$$

If  $X$  and  $Y$  are two sets and  $h : X \rightarrow Y$  is a function, for a subset  $A \subset Y$ , we denote by  $h^{-1}(A)$  the preimage of  $A$  under  $h$ , that is

$$h^{-1}(A) = \{x \in X, h(x) \in A\}.$$

Note that this does not require the function  $h$  to be injective.

For any  $n, N \in \mathbb{N}^*$  and any differentiable function  $f : \mathbb{R}^n \rightarrow \mathbb{R}^N$ , for all  $x \in \mathbb{R}^n$ , we denote by  $Df(x)$  its differential at the point  $x$ , i.e. the linear application  $Df(x) : \mathbb{R}^n \rightarrow \mathbb{R}^N$  satisfying, for all  $h \in \mathbb{R}^n$ ,

$$f(x + h) = f(x) + Df(x) \cdot h + o(h).$$

If we denote by  $x_j$  and  $h_j$  the components of  $x$  and  $h$ , for  $j \in \llbracket 1, n \rrbracket$ , we have

$$Df(x) \cdot h = \sum_{j=1}^n \frac{\partial f}{\partial x_j}(x) h_j,$$

where for all  $j$ ,  $\frac{\partial f}{\partial x_j}(x) \in \mathbb{R}^N$ . If  $f : \mathbb{R}^n \rightarrow \mathbb{R}^N$  is a linear application, we denote by  $\text{Ker } f$  the set  $\{x \in \mathbb{R}^n, f(x) = 0\}$ , which is a linear subset of  $\mathbb{R}^n$ .

## B The lifting operator $\phi$

Let us introduce the notion of ‘path’, extending the definition in Section 2.2. A path is a sequence of neurons  $(v_k, v_{k+1}, \dots, v_l) \in V_k \times V_{k+1} \times \dots \times V_l$ , for integers  $k, l$  satisfying  $0 \leq k \leq l \leq L$ . In particular, for all  $l \in \llbracket 0, L-1 \rrbracket$ , the set  $\mathcal{P}_l$  defined in Section 2.2 contains all the paths starting from layer  $l$  and ending in layer  $L-1$ . We recall

$$\mathcal{P} = \left( \bigcup_{l=0}^{L-1} \mathcal{P}_l \right) \cup \{\beta\}.$$

If  $k, l, m \in \mathbb{N}$  are three integers satisfying  $0 \leq k < l \leq m \leq L$ , and  $p = (v_k, \dots, v_{l-1}) \in V_k \times \dots \times V_{l-1}$  and  $p' = (v_l, \dots, v_m) \in V_l \times \dots \times V_m$  are two paths such that  $p$  ends in the layer preceding the starting layer of  $p'$ , we define the union of the paths by

$$p \cup p' = (v_k, \dots, v_{l-1}, v_l, \dots, v_m) \in V_k \times \dots \times V_m.$$

Before proving Proposition 1 let us compare briefly our construction to [39]. The lifting operator  $\phi$  introduced in Section 2.2 is similar to the operator  $\Phi$  in [39], except that  $\Phi$  does not take a matrix form. The operator  $\alpha(x, \theta)$  introduced in Section 2.2 corresponds partly to the object  $\bar{\alpha}(\theta, x)$  in [39]. One of the differences is that  $\bar{\alpha}(\theta, x)$  does not include any product with  $x_{v_0}$  in its entries, as does  $\alpha(x, \theta)$ . Finally, a similar statement to Proposition 1 and a similar proof can be found in [39]. However, one of the present contributions is to simplify the construction.

Let us now prove Proposition 1 which we restate here.

**Proposition 13.** For all  $\theta \in \mathbb{R}^E \times \mathbb{R}^B$  and all  $x \in \mathbb{R}^{V_0}$ ,

$$f_\theta(x)^T = \alpha(x, \theta) \phi(\theta).$$

*Proof.* Let us prove first the following expression, for all  $v_L \in V_L$ :

$$\begin{aligned} f_\theta(x)_{v_L} = & \left( \sum_{v_0 \in V_0} x_{v_0} w_{v_0 \rightarrow v_1} \prod_{l=1}^{L-1} a_{v_l}(x, \theta) w_{v_l \rightarrow v_{l+1}} \right) \\ & \vdots \\ & v_{L-1} \in V_{L-1} \\ & + \left( \sum_{l=1}^{L-1} \sum_{v_l \in V_l} b_{v_l} \prod_{l'=l}^{L-1} a_{v_{l'}}(x, \theta) w_{v_{l'} \rightarrow v_{l'+1}} \right) + b_{v_L}. \end{aligned} \quad (15)$$

We prove this by induction on the number  $L$  of layers of the network.

Initialization ( $L = 2$ ). Let  $v_2 \in V_2$ .

$$\begin{aligned} f_\theta(x)_{v_2} &= (W_2)_{v_2, :} \sigma(W_1 x + b_1) + b_{v_2} \\ &= \left( \sum_{v_1 \in V_1} w_{v_1 \rightarrow v_2} [\sigma(W_1 x + b_1)]_{v_1} \right) + b_{v_2} \\ &= \left( \sum_{v_1 \in V_1} w_{v_1 \rightarrow v_2} \sigma((W_1)_{v_1, :} x + b_{v_1}) \right) + b_{v_2} \\ &= \left( \sum_{v_1 \in V_1} w_{v_1 \rightarrow v_2} a_{v_1}(x, \theta) \left( \sum_{v_0 \in V_0} w_{v_0 \rightarrow v_1} x_{v_0} + b_{v_1} \right) \right) + b_{v_2} \\ &= \left( \sum_{\substack{v_0 \in V_0 \\ v_1 \in V_1}} w_{v_1 \rightarrow v_2} a_{v_1}(x, \theta) w_{v_0 \rightarrow v_1} x_{v_0} \right) + \left( \sum_{v_1 \in V_1} w_{v_1 \rightarrow v_2} a_{v_1}(x, \theta) b_{v_1} \right) + b_{v_2} \\ &= \left( \sum_{\substack{v_0 \in V_0 \\ v_1 \in V_1}} x_{v_0} w_{v_0 \rightarrow v_1} a_{v_1}(x, \theta) w_{v_1 \rightarrow v_2} \right) + \left( \sum_{v_1 \in V_1} b_{v_1} a_{v_1}(x, \theta) w_{v_1 \rightarrow v_2} \right) + b_{v_2} \end{aligned}$$

which proves (15), when  $L = 2$ .

Now let  $L \geq 3$  and suppose (15) holds for all ReLU networks with  $L - 1$  layers. Let us consider a network with  $L$  layers.

Let us denote by  $g_\theta(x)$  the output of the  $L - 1$  first layers of the network pre-activation (before applying the ReLUs of the layer  $L - 1$ ). The function  $g_\theta$  is that of a ReLU network with  $L - 1$  layers, and we have

$$f_\theta(x) = W_L \sigma(g_\theta(x)) + b_L.$$

Let  $v_L \in V_L$ . We thus have

$$f_\theta(x)_{v_L} = \sum_{v_{L-1} \in V_{L-1}} w_{v_{L-1} \rightarrow v_L} \sigma(g_\theta(x)_{v_{L-1}}) + b_{v_L}. \quad (16)$$

By the induction hypothesis, for all  $v_{L-1} \in V_{L-1}$ ,  $g_\theta(x)_{v_{L-1}}$  can be expressed with (15). Considering that  $\sigma(g_\theta(x)_{v_{L-1}}) = a_{v_{L-1}}(x, \theta) g_\theta(x)_{v_{L-1}}$  and replacing  $g_\theta(x)_{v_{L-1}}$  by its expression using (15), (16) becomes

$$\begin{aligned} f_\theta(x)_{v_L} &= \sum_{v_{L-1} \in V_{L-1}} w_{v_{L-1} \rightarrow v_L} a_{v_{L-1}}(x, \theta) \left[ \left( \sum_{\substack{v_0 \in V_0 \\ \vdots \\ v_{L-2} \in V_{L-2}}} x_{v_0} w_{v_0 \rightarrow v_1} \prod_{l=1}^{L-2} a_{v_l}(x, \theta) w_{v_l \rightarrow v_{l+1}} \right) \right. \\ &\quad \left. + \left( \sum_{l=1}^{L-2} \sum_{v_l \in V_l} b_{v_l} \prod_{l'=l}^{L-2} a_{v_{l'}}(x, \theta) w_{v_{l'} \rightarrow v_{l'+1}} \right) + b_{v_{L-1}} \right] + b_{v_L} \\ &= \left( \sum_{\substack{v_0 \in V_0 \\ \vdots \\ v_{L-1} \in V_{L-1}}} w_{v_{L-1} \rightarrow v_L} a_{v_{L-1}}(x, \theta) x_{v_0} w_{v_0 \rightarrow v_1} \prod_{l=1}^{L-2} a_{v_l}(x, \theta) w_{v_l \rightarrow v_{l+1}} \right) \\ &\quad + \left( \sum_{l=1}^{L-2} \sum_{v_l \in V_l} w_{v_{L-1} \rightarrow v_L} a_{v_{L-1}}(x, \theta) b_{v_l} \prod_{l'=l}^{L-2} a_{v_{l'}}(x, \theta) w_{v_{l'} \rightarrow v_{l'+1}} \right) \\ &\quad + \left( \sum_{v_{L-1} \in V_{L-1}} w_{v_{L-1} \rightarrow v_L} a_{v_{L-1}}(x, \theta) b_{v_{L-1}} \right) + b_{v_L} \\ &= \left( \sum_{\substack{v_0 \in V_0 \\ \vdots \\ v_{L-1} \in V_{L-1}}} x_{v_0} w_{v_0 \rightarrow v_1} \prod_{l=1}^{L-1} a_{v_l}(x, \theta) w_{v_l \rightarrow v_{l+1}} \right) \\ &\quad + \left( \sum_{l=1}^{L-1} \sum_{v_l \in V_l} b_{v_l} \prod_{l'=l}^{L-1} a_{v_{l'}}(x, \theta) w_{v_{l'} \rightarrow v_{l'+1}} \right) + b_{v_L}, \end{aligned}$$

which proves (15) holds for ReLU networks with  $L$  layers. This ends the induction, and we conclude that (15) holds for all ReLU networks.

We can now use this expression to prove Proposition 13. The first sum in (15) is taken over all the paths  $p = (v_0, \dots, v_{L-1}) \in \mathcal{P}_0$ , and each summand can be written as

$$x_{v_0} w_{v_0 \rightarrow v_1} \prod_{l=1}^{L-1} a_{v_l}(x, \theta) w_{v_l \rightarrow v_{l+1}} = \left( x_{v_0} \prod_{l=1}^{L-1} a_{v_l}(x, \theta) \right) \left( \prod_{l=0}^{L-1} w_{v_l \rightarrow v_{l+1}} \right) = \alpha_p(x, \theta) \phi_{p, v_L}(\theta).$$

For all  $l \in \llbracket 1, L-1 \rrbracket$ , the inner sum of the double sum in (15) is taken over all the paths  $p = (v_l, \dots, v_{L-1}) \in \mathcal{P}_l$ , and each summand can be written as

$$b_{v_l} \prod_{l'=l}^{L-1} a_{v_{l'}}(x, \theta) w_{v_{l'} \rightarrow v_{l'+1}} = \left( \prod_{l'=l}^{L-1} a_{v_{l'}}(x, \theta) \right) \left( b_{v_l} \prod_{l'=l}^{L-1} w_{v_{l'} \rightarrow v_{l'+1}} \right) = \alpha_p(x, \theta) \phi_{p, v_L}(\theta).$$

And finally, we can also write

$$b_{v_L} = \alpha_\beta(x, \theta) \phi_{\beta, v_L}(\theta).$$

Joining all these sums and denoting  $\phi_{:, v_L}(\theta) = (\phi_{p, v_L}(\theta))_{p \in \mathcal{P}} \in \mathbb{R}^{\mathcal{P}}$ , we have

$$f_\theta(x)_{v_L} = \sum_{p \in \mathcal{P}} \alpha_p(x, \theta) \phi_{p, v_L}(\theta) = \alpha(x, \theta) \phi_{:, v_L}(\theta),$$

so in other words,

$$f_\theta(x)^T = \alpha(x, \theta) \phi(\theta).$$

□

We restate here and prove Proposition 2

**Proposition 14.** For all  $n \in \mathbb{N}^*$ , for all  $X \in \mathbb{R}^{n \times V_0}$ , the mapping

$$\begin{aligned} \alpha_X : \mathbb{R}^E \times \mathbb{R}^B &\longrightarrow \mathbb{R}^{n \times \mathcal{P}} \\ \theta &\longmapsto \alpha(X, \theta) \end{aligned}$$

appearing in (3) is piecewise-constant, with a finite number of pieces. Furthermore, the boundary of each piece has Lebesgue measure zero. We call  $\Delta_X$  the union of all the boundaries. The set  $\Delta_X$  is closed and has Lebesgue measure zero.

*Proof.* Let us first notice that for any  $i \in \llbracket 1, n \rrbracket$ , for any  $l \in \llbracket 1, L-1 \rrbracket$ ,

$$(a_v(x^i, \theta))_{v \in V_1 \cup \dots \cup V_{l-1}} \in \{0, 1\}^{V_1 \cup \dots \cup V_{l-1}}$$

takes at most  $2^{N_1 + \dots + N_{l-1}}$  distinct values, so the mapping  $\theta \mapsto (a_v(x^i, \theta))_{v \in V_1 \cup \dots \cup V_{l-1}}$  is piecewise constant, with a finite number of pieces.

Let  $i \in \llbracket 1, n \rrbracket$ . Let  $l \in \llbracket 1, L-1 \rrbracket$  and  $v \in V_l$ . Recall the definition of  $f_{l-1}$ , as given in Section 2.1. The function  $\theta \rightarrow a_v(x^i, \theta)$  takes only two values, 1 or 0, and its values are determined by the sign of

$$\sum_{v' \in V_{l-1}} w_{v' \rightarrow v} f_{l-1}(x^i)_{v'} + b_v. \quad (17)$$

For all  $v' \in V_{l-1}$ , the value of  $f_{l-1}(x^i)_{v'}$  depends on  $\theta$ . On a piece  $P \subset \mathbb{R}^E \times \mathbb{R}^B$  such that  $(a_{v''}(x^i, \theta))_{v'' \in V_1 \cup \dots \cup V_{l-1}}$  is constant, this dependence is polynomial. Thus, on  $P$ , the value of (17) is a polynomial function of  $\theta$ , and since the coefficient applied to  $b_v$  is equal to 1, the corresponding polynomial is non constant. Since the values of  $a_v(x^i, \theta)$  are determined by the sign of (17), inside  $P$ , the boundary between  $\{\theta \in \mathbb{R}^E \times \mathbb{R}^B, a_v(x^i, \theta) = 0\}$  and  $\{\theta \in \mathbb{R}^E \times \mathbb{R}^B, a_v(x^i, \theta) = 1\}$  is included in the set of  $\theta$  for which (17) equals 0. This piece of boundary is thus contained in a level set of a non constant polynomial, whose Lebesgue measure is zero.

Since there is a finite number of pieces  $P$ , the Lebesgue measure of the boundary between  $\{\theta \in \mathbb{R}^E \times \mathbb{R}^B, a_v(x^i, \theta) = 0\}$  and  $\{\theta \in \mathbb{R}^E \times \mathbb{R}^B, a_v(x^i, \theta) = 1\}$ , which is contained in the union of the boundaries on all the pieces  $P$ , is thus equal to 0.

Since this is true for all  $l \in \llbracket 1, L-1 \rrbracket$  and all  $v \in V_l$ , the boundary of a piece over which  $(a_v(x^i, \theta))_{v \in V_1 \cup \dots \cup V_{L-1}}$  is constant also has Lebesgue measure zero.

Now since, for all  $x^i$ , the value of  $\alpha(x^i, \theta)$  only depends on  $(a_v(x^i, \theta))_{v \in V_1 \cup \dots \cup V_{L-1}}$  and since  $\alpha_X(\theta)$  is a matrix whose lines are the vectors  $\alpha(x^i, \theta)$ , we can conclude that

$$\begin{aligned} \alpha_X : \mathbb{R}^E \times \mathbb{R}^B &\longrightarrow \mathbb{R}^{n \times \mathcal{P}} \\ \theta &\longmapsto \alpha(X, \theta) \end{aligned}$$

is piecewise-constant, with a finite number of pieces, and that the boundary of each piece has Lebesgue measure zero.

A boundary is, by definition, closed. Finally, a finite union of closed sets with Lebesgue measure 0, as  $\Delta_X$  is, is closed and has Lebesgue measure 0. □

For convenience, we introduce the two following notations. Let  $l \in \llbracket 0, L \rrbracket$ . For any  $l' \in \llbracket 0, l \rrbracket$  and any path  $p_i = (v_{l'}, \dots, v_l) \in V_{l'} \times \dots \times V_l$ , we denote

$$\theta_{p_i} = \begin{cases} \prod_{k=0}^{l'-1} w_{v_k \rightarrow v_{k+1}} & \text{if } l' = 0 \\ b_{l'} \prod_{k=l'}^{l-1} w_{v_k \rightarrow v_{k+1}} & \text{if } l' \geq 1, \end{cases} \quad (18)$$

where as a classic convention, an empty product is equal to 1. In particular, if  $l = 0$ , for any  $p_i = (v_0) \in V_0$ , we have  $\theta_{p_i} = 1$ . For any path  $p_o = (v_l, \dots, v_L) \in V_l \times \dots \times V_L$ , we denote

$$\theta_{p_o} = \prod_{k=l}^{L-1} w_{v_k \rightarrow v_{k+1}}, \quad (19)$$

with again the convention that an empty product is equal to 1, so if  $l = L$ ,  $\theta_{p_o} = 1$ .

Some attention must be paid to the fact that for any  $l' \in \llbracket 1, L \rrbracket$ , if we take  $p_i$  in the case  $l = L$  and  $p_o$  in the case  $l = l'$ , it is possible to have

$$p_i = (v_{l'}, \dots, v_L) = p_o,$$

but in that case we DO NOT have  $\theta_{p_i} = \theta_{p_o}$ , since  $\theta_{p_i} = b_{l'} \prod_{k=l'}^{L-1} w_{v_k \rightarrow v_{k+1}}$  and  $\theta_{p_o} = \prod_{k=l'}^{L-1} w_{v_k \rightarrow v_{k+1}}$ . We will always denote the paths  $p_i$  and  $p_o$  with an  $i$  (as in ‘input’) or an  $o$  (as in ‘output’) to clarify which definition is used.

When considering another parameterization  $\tilde{\theta} \in \mathbb{R}^E \times \mathbb{R}^B$ , we denote by  $\tilde{\theta}_{p_i}$  and  $\tilde{\theta}_{p_o}$  the corresponding objects.

We establish different characterizations of the set  $S$  defined in Section 2.3 that will be useful in the proofs. As mentioned in Section 2.3 the subset of parameters  $(\mathbb{R}^E \times \mathbb{R}^B) \setminus S$  is close to the notion of ‘admissible’ parameter in [39], but is slightly larger since the condition  $w_{\bullet \rightarrow v} \neq 0$  is replaced by  $(w_{\bullet \rightarrow v}, b_v) \neq (0, 0)$ , for each hidden neuron  $v$ .

**Proposition 15.** *Let  $\theta \in \mathbb{R}^E \times \mathbb{R}^B$ . The following statements are equivalent.*

- i)  $\theta \in (\mathbb{R}^E \times \mathbb{R}^B) \setminus S$ .
- ii) For all  $l \in \llbracket 1, L-1 \rrbracket$  and all  $v_l \in V_l$ , there exist  $l' \in \llbracket 0, l \rrbracket$ , a path  $p_i = (v_{l'}, \dots, v_l) \in V_{l'} \times \dots \times V_l$  and a path  $p_o = (v_l, \dots, v_L) \in V_l \times \dots \times V_L$  such that
$$\theta_{p_i} \neq 0 \quad \text{and} \quad \theta_{p_o} \neq 0.$$
- iii) For all  $l \in \llbracket 1, L-1 \rrbracket$  and all  $v_l \in V_l$ , there exist  $l' \in \llbracket 0, l \rrbracket$ , a path  $p = (v_{l'}, \dots, v_l, \dots, v_{L-1}) \in \mathcal{P}_{l'}$  and  $v_L \in V_L$  such that
$$\phi_{p, v_L}(\theta) \neq 0.$$

*Proof.* Let us show successively that  $i) \Rightarrow ii)$ ,  $ii) \Rightarrow iii)$  and  $iii) \Rightarrow i)$ .

$i) \Rightarrow ii)$  Let  $\theta \in (\mathbb{R}^E \times \mathbb{R}^B) \setminus S$ . Let us show  $ii)$  holds.

Let  $l \in \llbracket 1, L \rrbracket$  and  $v_l \in V_l$ . To form a path  $p_i$  satisfying the condition, we follow the procedure:

```

 $p_i \leftarrow (v_l)$ 
 $k \leftarrow l$ 
while  $k \geq 1$  and  $b_k = 0$  do
     $\exists v_{k-1} \in V_{k-1}, w_{v_{k-1} \rightarrow v_k} \neq 0$ 
     $p_i \leftarrow (v_{k-1}, p_i)$ 
     $k \leftarrow k - 1$ 
end while
 $l' \leftarrow k$ 

```

The existence of  $v_{k-1}$  in the loop is guaranteed by the fact that  $\theta \notin S$  and  $b_k = 0$  in the condition of the while loop. In the end, we obtain a path  $p_i = (v_{l'}, \dots, v_l)$  with either  $l' > 0$  and  $b_{l'} \neq 0$ , or  $l' = 0$ . In both cases, we have by construction

$$\theta_{p_i} \neq 0.$$

We do similarly the other way to form a path  $p_o = (v_l, \dots, v_L)$ . We follow the procedure:

$p_o \leftarrow (v_l)$   
 $k \leftarrow l$   
**while**  $k \leq L - 1$  **do**  
 $\exists v_{k+1} \in V_{k+1}, w_{v_k \rightarrow v_{k+1}} \neq 0$   
 $p_o \leftarrow (p_o, v_{k+1})$   
 $k \leftarrow k + 1$   
**end while**

The existence of  $v_{k+1}$  in the loop is guaranteed by the fact that  $\theta \notin S$ . In the end, we obtain a path  $p_o = (v_l, \dots, v_L)$  satisfying by construction

$$\theta_{p_o} \neq 0.$$

ii)  $\rightarrow$  iii) Let  $l \in \llbracket 1, L - 1 \rrbracket$  and  $v_l \in V_l$ . There exist  $l' \in \llbracket 0, l \rrbracket$ , a path  $p_i = (v_{l'}, \dots, v_l) \in V_{l'} \times \dots \times V_l$  and a path  $p_o = (v_l, \dots, v_L) \in V_l \times \dots \times V_L$  such that

$$\theta_{p_i} \neq 0 \quad \text{and} \quad \theta_{p_o} \neq 0.$$

Denoting  $p = (v_{l'}, \dots, v_l, \dots, v_{L-1})$ , we have

$$\phi_{p, v_L}(\theta) = \theta_{p_i} \theta_{p_o} \neq 0.$$

iii)  $\rightarrow$  i) Let us show the contrapositive: let  $\theta \in S$ , and let us show the statement iii) is not true. Indeed, if  $\theta \in S$ , there exist  $l \in \llbracket 1, L - 1 \rrbracket$  and  $v_l \in V_l$  such that  $(w_{\bullet \rightarrow v_l}, b_{v_l}) = (0, 0)$  or  $w_{v_l \rightarrow \bullet} = 0$ . Consider a path  $p = (v_{l'}, \dots, v_l, \dots, v_{L-1})$  and  $v_L \in V_L$ . We have

$$\phi_{p, v_L}(\theta) = \begin{cases} b_{v_{l'}} w_{v_{l'} \rightarrow v_{l'+1}} \dots w_{v_{l-1} \rightarrow v_l} w_{v_l \rightarrow v_{l+1}} \dots w_{v_{L-1} \rightarrow v_L} & \text{if } l' \geq 1 \\ w_{v_0 \rightarrow v_1} \dots w_{v_{l-1} \rightarrow v_l} w_{v_l \rightarrow v_{l+1}} \dots w_{v_{L-1} \rightarrow v_L} & \text{if } l' = 0. \end{cases}$$

If  $(w_{\bullet \rightarrow v_l}, b_{v_l}) = (0, 0)$ , either  $l' = l$  and  $b_{v_{l'}} = 0$  so  $\phi_{p, v_L}(\theta) = 0$ , or  $l' < l$  and since  $w_{v_{l-1} \rightarrow v_l} = 0$ , we have  $\phi_{p, v_L}(\theta) = 0$ .

If  $w_{v_l \rightarrow \bullet} = 0$ ,  $w_{v_l \rightarrow v_{l+1}} = 0$  so  $\phi_{p, v_L}(\theta) = 0$ . Thus iii) is not satisfied.  $\square$

We restate and prove Proposition 4.

**Proposition 16.** For all  $\theta, \tilde{\theta} \in \mathbb{R}^E \times \mathbb{R}^B$ , we have

$$\theta \stackrel{R}{\sim} \tilde{\theta} \implies \phi(\theta) = \phi(\tilde{\theta}),$$

and thus in particular

$$\theta \sim \tilde{\theta} \implies \phi(\theta) = \phi(\tilde{\theta}).$$

*Proof.* Let  $\theta, \tilde{\theta} \in \mathbb{R}^E \times \mathbb{R}^B$  such that  $\theta \stackrel{R}{\sim} \tilde{\theta}$ . There exists a family  $(\lambda^0, \dots, \lambda^L) \in (\mathbb{R}^*)^{V_0} \times \dots \times (\mathbb{R}^*)^{V_L}$ , with  $\lambda^0 = \mathbf{1}_{V_0}$  and  $\lambda^L = \mathbf{1}_{V_L}$ , such that for all  $l \in \llbracket 1, L \rrbracket$ , for all  $(v_{l-1}, v_l) \in V_{l-1} \times V_l$ , (6) holds. We consider first a path  $p = (v_0, \dots, v_{L-1}) \in \mathcal{P}_0$  and  $v_L \in V_L$ . Using (6) and the fact that  $\lambda_{v_0}^0 = \lambda_{v_L}^L = 1$ , we have

$$\phi_{p, v_L}(\theta) = \prod_{l=1}^L w_{v_{l-1} \rightarrow v_l} = \prod_{l=1}^L \frac{\lambda_{v_l}^l}{\lambda_{v_{l-1}}^{l-1}} \tilde{w}_{v_{l-1} \rightarrow v_l} = \frac{\lambda_{v_L}^L}{\lambda_{v_0}^0} \prod_{l=1}^L \tilde{w}_{v_{l-1} \rightarrow v_l} = \phi_{p, v_L}(\tilde{\theta}).$$

Similarly, for  $l \in \llbracket 1, L - 1 \rrbracket$  and a path  $p = (v_l, \dots, v_{L-1}) \in \mathcal{P}_l$ , and for all  $v_L \in V_L$ , we have, using (6) and the fact that  $\lambda_{v_L}^L = 1$ ,

$$\begin{aligned} \phi_{p, v_L}(\theta) &= b_{v_l} \prod_{l'=l+1}^L w_{v_{l'-1} \rightarrow v_{l'}} = \lambda_{v_l}^l \tilde{b}_{v_l} \prod_{l'=l+1}^L \frac{\lambda_{v_{l'}}^{l'}}{\lambda_{v_{l'-1}}^{l'-1}} \tilde{w}_{v_{l'-1} \rightarrow v_{l'}} = \lambda_{v_L}^L \tilde{b}_{v_l} \prod_{l'=l+1}^L \tilde{w}_{v_{l'-1} \rightarrow v_{l'}} \\ &= \phi_{p, v_L}(\tilde{\theta}). \end{aligned}$$

Finally, for  $p = \beta$  and  $v_L \in V_L$ , we have

$$\phi_{p, v_L}(\theta) = b_{v_L} = \lambda_{v_L}^L \tilde{b}_{v_L} = \tilde{b}_{v_L} = \phi_{p, v_L}(\tilde{\theta}).$$

This shows  $\phi(\theta) = \phi(\tilde{\theta})$ .

For the second implication, we simply use the fact that if  $\theta \sim \tilde{\theta}$ , in particular,  $\theta \stackrel{R}{\sim} \tilde{\theta}$ .  $\square$

**Corollary 17.** The set  $(\mathbb{R}^E \times \mathbb{R}^B) \setminus S$  is stable by rescaling equivalence: if  $\theta \in (\mathbb{R}^E \times \mathbb{R}^B) \setminus S$ , and  $\tilde{\theta} \in \mathbb{R}^E \times \mathbb{R}^B$  satisfies  $\theta \stackrel{R}{\sim} \tilde{\theta}$ , then  $\tilde{\theta} \in (\mathbb{R}^E \times \mathbb{R}^B) \setminus S$ .

*Proof.* Let  $\theta \in (\mathbb{R}^E \times \mathbb{R}^B) \setminus S$  and  $\tilde{\theta} \in \mathbb{R}^E \times \mathbb{R}^B$  such that  $\theta \stackrel{R}{\sim} \tilde{\theta}$ . Proposition 16 shows that  $\phi(\tilde{\theta}) = \phi(\theta)$ .

Let  $l \in \llbracket 1, L \rrbracket$  and  $v \in V_l$ . Since  $\theta \in (\mathbb{R}^E \times \mathbb{R}^B) \setminus S$ , according to Proposition 15 there exists  $l' \in \llbracket 0, l \rrbracket$ , a path  $p = (v_{l'}, \dots, v_l, \dots, v_{L-1})$  and  $v_L \in V_L$  such that  $\phi_{p, v_L}(\theta) \neq 0$ . We have

$$\phi_{p, v_L}(\tilde{\theta}) = \phi_{p, v_L}(\theta) \neq 0,$$

and since this is true for any  $l \in \llbracket 1, L \rrbracket$  and  $v \in V_l$ , Proposition 15 shows that  $\tilde{\theta} \in (\mathbb{R}^E \times \mathbb{R}^B) \setminus S$ .  $\square$

We restate and prove Proposition 5.

**Proposition 18.** For all  $\theta \in (\mathbb{R}^E \times \mathbb{R}^B) \setminus S$ , for all  $\tilde{\theta} \in \mathbb{R}^E \times \mathbb{R}^B$ ,

$$\phi(\theta) = \phi(\tilde{\theta}) \implies \theta \stackrel{R}{\sim} \tilde{\theta}.$$

*Proof.* Let us choose  $(\lambda^0, \dots, \lambda^L) \in (\mathbb{R}^*)^{V_0} \times \dots \times (\mathbb{R}^*)^{V_L}$  as follows. For all  $l \in \llbracket 1, L-1 \rrbracket$  and all  $v_l \in V_l$ , since  $\theta \in (\mathbb{R}^E \times \mathbb{R}^B) \setminus S$ , Proposition 15 shows that there exists a path  $p_o(v_l) = (v_l, \dots, v_L) \in V_l \times \dots \times V_L$  such that  $\theta_{p_o(v_l)} \neq 0$ . Let us define  $\lambda^0 = \mathbf{1}_{V_0}$ ,  $\lambda^L = \mathbf{1}_{V_L}$  and for all  $l \in \llbracket 1, L-1 \rrbracket$ ,

$$\lambda_{v_l}^l = \frac{\tilde{\theta}_{p_o(v_l)}}{\theta_{p_o(v_l)}}.$$

The value of  $\lambda_{v_l}^l$  a priori depends on the choice of the path  $p_o(v_l)$ , but the first of the two following facts, that we are going to prove, shows it only depends on  $v_l$ , since in (20),  $p_i$  does not depend on  $p_o(v_l)$ .

- For all  $l \in \llbracket 0, L \rrbracket$ , for all  $v_l \in V_l$ , for any  $l' \in \llbracket 0, l \rrbracket$  and any  $p_i = (v_{l'}, \dots, v_l) \in V_{l'} \times \dots \times V_l$ ,

$$\theta_{p_i} = \lambda_{v_l}^l \tilde{\theta}_{p_i}. \quad (20)$$

- For all  $l \in \llbracket 0, L \rrbracket$ , for all  $v_l \in V_l$ ,  $\lambda_{v_l}^l \neq 0$ .

Indeed, let  $l \in \llbracket 0, L \rrbracket$  and let us consider  $l' \in \llbracket 0, l \rrbracket$  and a path  $p_i = (v_{l'}, \dots, v_l) \in V_{l'} \times \dots \times V_l$ . Let  $v_{l+1}, \dots, v_L \in V_{l+1} \times \dots \times V_L$  such that  $p_o(v_l) = (v_l, v_{l+1}, \dots, v_L)$ . Let  $p = (v_{l'}, \dots, v_l, \dots, v_{L-1}) \in \mathcal{P}_{l'}$  so that  $p_i \cup p_o(v_l) = p \cup (v_L)$ . We have by hypothesis

$$\theta_{p_i} \theta_{p_o(v_l)} = \phi_{p, v_L}(\theta) = \phi_{p, v_L}(\tilde{\theta}) = \tilde{\theta}_{p_i} \tilde{\theta}_{p_o(v_l)},$$

thus

$$\theta_{p_i} = \frac{\tilde{\theta}_{p_o(v_l)}}{\theta_{p_o(v_l)}} \tilde{\theta}_{p_i} = \lambda_{v_l}^l \tilde{\theta}_{p_i},$$

which proves the first point. To prove the second point, we simply use Proposition 15 to consider a path  $p_i$  such that  $\theta_{p_i} \neq 0$ , and (20) shows that  $\lambda_{v_l}^l \neq 0$ .

Let us now prove the rescaling equivalence. Let  $l \in \llbracket 1, L \rrbracket$ , and let  $(v_{l-1}, v_l) \in V_{l-1} \times V_l$ . Let us consider, thanks to Proposition 15,  $l' \in \llbracket 0, l-1 \rrbracket$  and a path  $p_i = (v_{l'}, \dots, v_{l-1}) \in V_{l'} \times \dots \times V_{l-1}$  such that  $\theta_{p_i} \neq 0$ . The relation (20) shows we also have  $\tilde{\theta}_{p_i} \neq 0$ . Let  $p'_i = p_i \cup (v_l)$ . Using (20) with  $\theta_{p'_i}$  we have

$$\theta_{p_i} w_{v_{l-1} \rightarrow v_l} = \theta_{p'_i} = \lambda_{v_l}^l \tilde{\theta}_{p'_i} = \lambda_{v_l}^l \tilde{\theta}_{p_i} \tilde{w}_{v_{l-1} \rightarrow v_l}.$$

At the same time, using (20) with  $\theta_{p_i}$  we have,

$$\theta_{p_i} w_{v_{l-1} \rightarrow v_l} = \lambda_{v_{l-1}}^{l-1} \tilde{\theta}_{p_i} w_{v_{l-1} \rightarrow v_l},$$

so combining both equalities, we have

$$\lambda_{v_l}^l \tilde{\theta}_{p_i} \tilde{w}_{v_{l-1} \rightarrow v_l} = \lambda_{v_{l-1}}^{l-1} \tilde{\theta}_{p_i} w_{v_{l-1} \rightarrow v_l}.$$

Using the fact that  $\tilde{\theta}_{p_i} \neq 0$  and  $\lambda_{v_{l-1}}^{l-1} \neq 0$ , we finally obtain, for all  $l \in \llbracket 1, L \rrbracket$  and all  $(v_{l-1}, v_l) \in V_{l-1} \times V_l$ :

$$w_{v_{l-1} \rightarrow v_l} = \frac{\lambda_{v_l}^l}{\lambda_{v_{l-1}}^{l-1}} \tilde{w}_{v_{l-1} \rightarrow v_l}.$$

For all  $l \in \llbracket 1, L \rrbracket$  and all  $v_l \in V_l$ , using (20) with  $p_i = (v_l)$ , we obtain

$$b_{v_l} = \lambda_{v_l}^l \tilde{b}_{v_l}.$$

This shows that (6) is satisfied for all  $(v_{l-1}, v_l) \in V_{l-1} \times V_l$ , and thus  $\theta \stackrel{R}{\sim} \tilde{\theta}$ .  $\square$

The following proposition is useful in the proof of Theorem 26 and allows to improve identifiability modulo rescaling into identifiability modulo positive rescaling.

**Proposition 19.** *For all  $\theta \in (\mathbb{R}^E \times \mathbb{R}^B) \setminus S$ , there exists  $\epsilon > 0$  such that for all  $\tilde{\theta} \in \mathbb{R}^E \times \mathbb{R}^B$ ,*

$$\|\theta - \tilde{\theta}\|_\infty < \epsilon \text{ and } \theta \stackrel{R}{\sim} \tilde{\theta} \implies \theta \sim \tilde{\theta}.$$

*Proof.* Let  $\theta \in (\mathbb{R}^E \times \mathbb{R}^B) \setminus S$ . We define

$$\epsilon = \min \left( \{|w_{v \rightarrow v'}|, v \rightarrow v' \in E \text{ and } w_{v \rightarrow v'} \neq 0\} \cup \{|b_v|, v \in B \text{ and } b_v \neq 0\} \right).$$

Let  $\tilde{\theta} \in \mathbb{R}^E \times \mathbb{R}^B$  such that  $\|\theta - \tilde{\theta}\|_\infty < \epsilon$  and  $\theta \stackrel{R}{\sim} \tilde{\theta}$ . To prove  $\theta \sim \tilde{\theta}$ , we simply have to prove  $\text{sign}(\theta) = \text{sign}(\tilde{\theta})$ . There exists  $(\lambda^0, \dots, \lambda^L) \in (\mathbb{R}^*)^{V_0} \times \dots \times (\mathbb{R}^*)^{V_L}$ , with  $\lambda^0 = \mathbf{1}_{V_0}$  and  $\lambda^L = \mathbf{1}_{V_L}$ , such that, for all  $l \in \llbracket 1, L \rrbracket$ , for all  $(v_{l-1}, v_l) \in V_{l-1} \times V_l$ , (6) holds. Let us show that  $\text{sign}(\theta) = \text{sign}(\tilde{\theta})$ .

Indeed, let  $l \in \llbracket 1, L \rrbracket$ , and let  $(v, v') \in V_{l-1} \times V_l$ . If  $w_{v \rightarrow v'} \neq 0$ , then since  $|w_{v \rightarrow v'} - \tilde{w}_{v \rightarrow v'}| < \epsilon$  and by definition  $\epsilon \leq |w_{v \rightarrow v'}|$ , we have  $\text{sign}(w_{v \rightarrow v'}) = \text{sign}(\tilde{w}_{v \rightarrow v'})$ . Otherwise, if  $w_{v \rightarrow v'} = 0$ , (6) shows that we have

$$\tilde{w}_{v \rightarrow v'} = \frac{\lambda_v^{l-1}}{\lambda_{v'}^l} w_{v \rightarrow v'} = 0,$$

so we still have  $\text{sign}(w_{v \rightarrow v'}) = \text{sign}(\tilde{w}_{v \rightarrow v'})$ .

Now let  $l \in \llbracket 1, L \rrbracket$  and let  $v \in V_l$ . Similarly, if  $b_v \neq 0$ , we have  $|b_v - \tilde{b}_v| < \epsilon \leq |b_v|$ , so  $\text{sign}(b_v) = \text{sign}(\tilde{b}_v)$ , and if  $b_v = 0$ , we have

$$\tilde{b}_v = \frac{b_v}{\lambda_v^l} = 0,$$

so again  $\text{sign}(b_v) = \text{sign}(\tilde{b}_v)$ .

This shows  $\text{sign}(\theta) = \text{sign}(\tilde{\theta})$ , so  $\theta \sim \tilde{\theta}$ .  $\square$

## C The smooth manifold structure of $\Sigma_1^*$

In this section, we prove Theorem 7 which is restated as Theorem 25. Before doing so, we establish intermediary results, some of which are evoked in Section 3.

Let us discuss the cardinal of  $F_\theta$  defined in Section 3. The set  $F_\theta$  is obtained by removing the edges of the form  $v \rightarrow s_{\max}^\theta(v)$  for  $v \in V_1 \cup \dots \cup V_{L-1}$ . Note that we do not remove the edges of the form  $v \rightarrow s_{\max}^\theta(v)$  for  $v \in V_0$ . For all  $l \in \llbracket 1, L-1 \rrbracket$ , there are precisely  $N_l$  edges of the form  $(v, s_{\max}^\theta(v))$  with  $v \in V_l$ , so

$$\begin{aligned} |F_\theta| &= |E| - (N_1 + \dots + N_{L-1}) \\ &= N_0 N_1 + \dots + N_{L-1} N_L - N_1 - \dots - N_{L-1}. \end{aligned}$$

As a consequence, since  $|B| = N_1 + \dots + N_L$ , we have in particular

$$\begin{aligned} |F_\theta| + |B| &= N_0 N_1 + \dots + N_{L-1} N_L - N_1 - \dots - N_{L-1} + N_1 + \dots + N_L \\ &= N_0 N_1 + \dots + N_{L-1} N_L + N_L. \end{aligned} \quad (21)$$

The following proposition is a first step towards Proposition 21, which states that  $\psi^\theta$  is a homeomorphism.

**Proposition 20.** *For all  $\theta \in (\mathbb{R}^E \times \mathbb{R}^B) \setminus S$ , the function  $\psi^\theta : U_\theta \rightarrow \mathbb{R}^{P \times V_L}$  is injective.*

*Proof.* Let  $\tau, \tilde{\tau} \in U_\theta$  such that  $\psi^\theta(\tau) = \psi^\theta(\tilde{\tau})$ . Let us show  $\tau = \tilde{\tau}$ . We have  $\phi(\rho_\theta(\tau)) = \phi(\rho_\theta(\tilde{\tau}))$  and by definition of  $U_\theta$ ,  $\rho_\theta(\tau) \in (\mathbb{R}^E \times \mathbb{R}^B) \setminus S$ , so by Proposition 18 we have the rescaling equivalence

$$\rho_\theta(\tau) \stackrel{R}{\sim} \rho_\theta(\tilde{\tau}).$$

By definition of the rescaling equivalence, in its formulation 6, there exists  $(\lambda^0, \dots, \lambda^L) \in (\mathbb{R}^*)^{V_0} \times \dots \times (\mathbb{R}^*)^{V_L}$ , with  $\lambda^0 = \mathbf{1}_{V_0}$  and  $\lambda^L = \mathbf{1}_{V_L}$ , such that, for all  $l \in \llbracket 1, L \rrbracket$ , for all  $(v_{l-1}, v_l) \in V_{l-1} \times V_l$ ,

$$\begin{cases} \rho_\theta(\tau)_{v_{l-1} \rightarrow v_l} = \frac{(\lambda^l)_{v_l}}{(\lambda^{l-1})_{v_{l-1}}} \rho_\theta(\tilde{\tau})_{v_{l-1} \rightarrow v_l} \\ b_{v_l} = \lambda_{v_l}^l \tilde{b}_{v_l}. \end{cases} \quad (22)$$

Let  $l \in \llbracket 2, L \rrbracket$  and let  $v_{l-1} \in V_{l-1}$ . Let  $v_l = s_{\max}^\theta(v_{l-1})$ . According to 22 we have

$$\rho_\theta(\tau)_{v_{l-1} \rightarrow v_l} = \frac{(\lambda^l)_{v_l}}{(\lambda^{l-1})_{v_{l-1}}} \rho_\theta(\tilde{\tau})_{v_{l-1} \rightarrow v_l}.$$

But since  $v_l = s_{\max}^\theta(v_{l-1})$  and  $v_{l-1} \in V_{l-1}$  with  $l-1 \in \llbracket 1, L-1 \rrbracket$ , we have  $v_{l-1} \rightarrow v_l \in E \setminus F_\theta$ , so by definition of  $\rho_\theta$  in 9,

$$\rho_\theta(\tau)_{v_{l-1} \rightarrow v_l} = w_{v_{l-1} \rightarrow v_l} = \rho_\theta(\tilde{\tau})_{v_{l-1} \rightarrow v_l} \neq 0,$$

$$\text{so } \frac{(\lambda^l)_{v_l}}{(\lambda^{l-1})_{v_{l-1}}} = 1.$$

We have shown that for all  $l \in \llbracket 2, L \rrbracket$ , for all  $v_{l-1} \in V_{l-1}$ , there exists  $v_l \in V_l$  such that

$$(\lambda^{l-1})_{v_{l-1}} = (\lambda^l)_{v_l}.$$

As a consequence, if  $l$  is such that  $\lambda^l = \mathbf{1}_{V_l}$ , then  $\lambda^{l-1} = \mathbf{1}_{V_{l-1}}$ .

Starting from  $\lambda^L = \mathbf{1}_{V_L}$ , this shows by induction that for all  $l \in \llbracket 1, L \rrbracket$ ,

$$\lambda^l = \mathbf{1}_{V_l}.$$

By hypothesis we also have  $\lambda^0 = \mathbf{1}_{V_0}$ . Using 22, this shows that

$$\rho_\theta(\tau) = \rho_\theta(\tilde{\tau}).$$

The injectivity of  $\rho_\theta$  allows us to conclude that

$$\tau = \tilde{\tau}.$$

□

The following proposition shows, as mentioned in Section 3 that  $\psi^\theta$  is a homeomorphism. This is a necessary step to prove that  $(V_\theta, (\psi^\theta)^{-1})_{\theta \in (\mathbb{R}^E \times \mathbb{R}^B) \setminus S}$  is an atlas of  $\Sigma_1^*$ .

**Proposition 21.** *For all  $\theta \in (\mathbb{R}^E \times \mathbb{R}^B) \setminus S$ ,  $\psi^\theta$  is a homeomorphism from  $U_\theta$  onto its image  $V_\theta$ .*

*Proof.* We already know from Proposition 20 that  $\psi^\theta$  is injective, so we need to prove that  $\psi^\theta$  is continuous and its inverse is continuous. The function  $\rho_\theta$  is affine and  $\phi$  is a polynomial function, so the function  $\psi^\theta = \phi \circ \rho_\theta$  is a polynomial function, and in particular it is continuous.

To prove that  $(\psi^\theta)^{-1}$  is continuous, we consider a sequence  $(\tau_n)$  taking values in  $U_\theta$  and  $\tau \in U_\theta$  such that  $\psi^\theta(\tau_n) \rightarrow \psi^\theta(\tau)$ , and we want to show that  $\tau_n \rightarrow \tau$ .

Let us first show that for all  $v \in B$ ,  $(\tau_n)_v \rightarrow \tau_v$ . Indeed, let  $l \in \llbracket 1, L \rrbracket$  and let  $v_l \in V_l$ , so that  $v_l$  is an arbitrary element of  $B$ . Let us define  $v_{l+1} = s_{\max}^\theta(v_l)$ , then  $v_{l+2} = s_{\max}^\theta(v_{l+1})$  and so on up to  $v_L = s_{\max}^\theta(v_{L-1})$ . Since for all  $l' \in \llbracket l, L-1 \rrbracket$ ,  $v_{l'+1} = s_{\max}^\theta(v_{l'})$ , by definition of  $F_\theta$  and  $\rho_\theta$  (see (8) and (9)), we have

$$\rho_\theta(\tau_n)_{v_{l'} \rightarrow v_{l'+1}} = w_{v_{l'} \rightarrow v_{l'+1}}, \quad (23)$$

and

$$\rho_\theta(\tau)_{v_{l'} \rightarrow v_{l'+1}} = w_{v_{l'} \rightarrow v_{l'+1}}. \quad (24)$$

In particular, since  $\theta \notin S$ , for all  $l' \in \llbracket l, L-1 \rrbracket$  we have  $w_{v_{l'} \rightarrow \bullet} \neq 0$ , so by definition of  $s_{\max}^\theta$ ,  $w_{v_{l'} \rightarrow v_{l'+1}} \neq 0$ . We thus have

$$w_{v_l \rightarrow v_{l+1}} \cdots w_{v_{L-1} \rightarrow v_L} \neq 0. \quad (25)$$

If we denote  $p = (v_l, \dots, v_{L-1})$ , we have, using the definition of  $\phi$  and (23),

$$\psi_{p, v_L}^\theta(\tau_n) = (\tau_n)_{v_l} w_{v_l \rightarrow v_{l+1}} \cdots w_{v_{L-1} \rightarrow v_L}$$

and using (24),

$$\psi_{p, v_L}^\theta(\tau) = (\tau)_{v_l} w_{v_l \rightarrow v_{l+1}} \cdots w_{v_{L-1} \rightarrow v_L}.$$

Using (25) and the fact that

$$\psi^\theta(\tau_n) \rightarrow \psi^\theta(\tau),$$

we conclude that

$$(\tau_n)_{v_l} \rightarrow \tau_{v_l}.$$

Let us now prove that for all  $(v, v') \in E$ ,  $(\tau_n)_{v \rightarrow v'} \rightarrow \tau_{v \rightarrow v'}$ . Let us show by induction on  $l \in \llbracket 1, L \rrbracket$  the following hypothesis

$$\forall l' \in \llbracket 1, l \rrbracket, \quad \forall (v, v') \in (V_{l'-1} \times V_{l'}) \cap F_\theta, \quad (\tau_n)_{v \rightarrow v'} \longrightarrow \tau_{v \rightarrow v'}. \quad (H_l)$$

**Initialization.** Let  $(v_0, v_1) \in (V_0 \times V_1) \cap F_\theta$ . We define  $v_2 = s_{\max}^\theta(v_1)$ , then we define  $v_3 = s_{\max}^\theta(v_2)$ , and so on up to  $v_L = s_{\max}^\theta(v_{L-1})$ . Let  $p = (v_0, \dots, v_{L-1}) \in \mathcal{P}$ .

As above, using the definition of  $\rho_\theta$ ,  $F_\theta$  and  $\phi$ , we have

$$\psi_{p, v_L}^\theta(\tau_n) = (\tau_n)_{v_0 \rightarrow v_1} w_{v_1 \rightarrow v_2} \cdots w_{v_{L-1} \rightarrow v_L}$$

and

$$\psi_{p, v_L}^\theta(\tau) = (\tau)_{v_0 \rightarrow v_1} w_{v_1 \rightarrow v_2} \cdots w_{v_{L-1} \rightarrow v_L},$$

and since  $\theta \notin S$ , we also have, as above,

$$w_{v_1 \rightarrow v_2} \cdots w_{v_{L-1} \rightarrow v_L} \neq 0. \quad (26)$$

Since

$$\psi^\theta(\tau_n) \longrightarrow \psi^\theta(\tau)$$

we conclude using (26) that

$$(\tau_n)_{v_0 \rightarrow v_1} \longrightarrow \tau_{v_0 \rightarrow v_1}.$$

We have shown  $H_1$ .

**Induction step.** Let  $l \in \llbracket 2, L \rrbracket$  and let us assume that  $H_{l-1}$  holds.

Let  $(v_{l-1}, v_l) \in (V_{l-1} \times V_l) \cap F_\theta$ . We define  $v_{l+1} = s_{\max}^\theta(v_l)$ ,  $v_{l+2} = s_{\max}^\theta(v_{l+1})$ , and so on up to  $v_L = s_{\max}^\theta(v_{L-1})$ . Let us denote  $p_o = (v_l, \dots, v_L)$ . Recalling the notation defined in (19), we have

$$\rho_\theta(\tau_n)_{p_o} = w_{v_l \rightarrow v_{l+1}} \cdots w_{v_{L-1} \rightarrow v_L} = \rho_\theta(\tau)_{p_o} \neq 0. \quad (27)$$

At the same time, since  $\tau \in U_\theta$ , Proposition 15 shows there exist  $l' \in \llbracket 0, l-1 \rrbracket$  and a path  $p_i = (v_{l'}, \dots, v_{l-2}, v_{l-1})$  such that

$$\rho_\theta(\tau)_{p_i} \neq 0. \quad (28)$$

If  $l' \geq 1$ , we have shown in the first part of the proof that  $(\tau_n)_{v_{l'}} \longrightarrow \tau_{v_{l'}}$ . Moreover, whatever the value of  $l'$  is, for  $k \in \llbracket l', l-2 \rrbracket$ , if  $(v_k, v_{k+1}) \in E \setminus F_\theta$ ,

$$\rho_\theta(\tau_n)_{v_k \rightarrow v_{k+1}} = w_{v_k \rightarrow v_{k+1}} = \rho_\theta(\tau)_{v_k \rightarrow v_{k+1}},$$

and if  $(v_k, v_{k+1}) \in F_\theta$ , according to  $H_{l-1}$ ,

$$\rho_\theta(\tau_n)_{v_k \rightarrow v_{k+1}} = (\tau_n)_{v_k \rightarrow v_{k+1}} \longrightarrow \tau_{v_k \rightarrow v_{k+1}} = \rho_\theta(\tau)_{v_k \rightarrow v_{k+1}}.$$

We therefore have

$$\rho_\theta(\tau_n)_{p_i} \longrightarrow \rho_\theta(\tau)_{p_i}, \quad (29)$$

and in particular, since  $\rho_\theta(\tau)_{p_i} \neq 0$ , there exists  $n_0 \in \mathbb{N}$  such that for all  $n \geq n_0$ ,

$$\rho_\theta(\tau_n)_{p_i} \neq 0. \quad (30)$$

We can write

$$\psi_{p, v_L}^\theta(\tau_n) = \rho_\theta(\tau_n)_{p_i} (\tau_n)_{v_{l-1} \rightarrow v_l} \rho_\theta(\tau_n)_{p_o}$$

and

$$\psi_{p, v_L}^\theta(\tau) = \rho_\theta(\tau)_{p_i} (\tau)_{v_{l-1} \rightarrow v_l} \rho_\theta(\tau)_{p_o},$$

so using (27), (30) and (29), we have

$$(\tau_n)_{v_{l-1} \rightarrow v_l} = \frac{\psi_{p, v_L}^\theta(\tau_n)}{\rho_\theta(\tau_n)_{p_i} \rho_\theta(\tau_n)_{p_o}} \longrightarrow \frac{\psi_{p, v_L}^\theta(\tau)}{\rho_\theta(\tau)_{p_i} \rho_\theta(\tau)_{p_o}} = \tau_{v_{l-1} \rightarrow v_l}.$$

We have shown  $H_l$ , which concludes the induction step.

In particular,  $H_L$  is satisfied, and finally  $\tau_n \rightarrow \tau$ .

This shows that  $\psi^\theta$  is a homeomorphism.  $\square$

The following lemma is necessary for the proof of Proposition 23

**Lemma 22.** Let  $\theta \in (\mathbb{R}^E \times \mathbb{R}^B) \setminus S$ . Let  $(v, v') \in E$  (resp.  $v \in B$ ). If  $w_{v \rightarrow v'} \neq 0$  (resp.  $b_v \neq 0$ ), then there exists  $\epsilon > 0$  such that for all  $\tilde{\theta} \in \mathbb{R}^E \times \mathbb{R}^B$ , if  $\|\phi(\theta) - \phi(\tilde{\theta})\|_\infty < \epsilon$ , then  $\tilde{w}_{v \rightarrow v'} \neq 0$  (resp.  $\tilde{b}_v \neq 0$ ).

*Proof.* Let  $\theta \in (\mathbb{R}^E \times \mathbb{R}^B) \setminus S$  and  $(v, v') \in E$  such that  $w_{v \rightarrow v'} \neq 0$ . Denote  $l \in \llbracket 0, L-1 \rrbracket$  such that  $v \in V_l$ . If  $l = 0$ , we take  $p_i = (v)$  so that by convention  $\theta_{p_i} = 1 \neq 0$ , and if  $l \geq 1$ , we use Proposition 15 which states that there exists  $l' \in \llbracket 0, l-1 \rrbracket$  and a path  $p_i = (v_{l'}, \dots, v_{l-2}, v)$  such that  $\theta_{p_i} \neq 0$ . Similarly, if  $l = L-1$ , we take  $p_o = (v')$  so that by convention  $\theta_{p_o} = 1 \neq 0$  and if  $l < L-1$ , we use Proposition 15 which states that there exists a path  $p_o = (v', v_{l+1}, \dots, v_L)$  such that  $\theta_{p_o} \neq 0$ . If we denote

$$p = \begin{cases} (v, v', v_{l+2}, \dots, v_{L-1}) & \text{if } l = 0 \\ (v_{l'}, \dots, v_{l-1}, v, v') & \text{if } l = L-1 \\ (v_{l'}, \dots, v_{l-1}, v, v', v_{l+2}, \dots, v_{L-1}) & \text{otherwise,} \end{cases}$$

we have

$$\phi_{p, v_L}(\theta) = \theta_{p_i} w_{v \rightarrow v'} \theta_{p_o} \neq 0.$$

We define  $\epsilon = |\phi_{p, v_L}(\theta)| > 0$ . For all  $\tilde{\theta} \in \mathbb{R}^E \times \mathbb{R}^B$  such that  $\|\phi(\tilde{\theta}) - \phi(\theta)\|_\infty < \epsilon$  we have

$$\phi_{p, v_L}(\tilde{\theta}) \neq 0.$$

Since  $\phi_{p, v_L}(\tilde{\theta}) = \tilde{\theta}_{p_i} \tilde{w}_{v \rightarrow v'} \tilde{\theta}_{p_o}$ , this implies in particular that

$$\tilde{w}_{v \rightarrow v'} \neq 0.$$

The proof is similar in the case  $v \in B$  and  $b_v \neq 0$ .  $\square$

The following proposition, which states that for any  $\theta \in (\mathbb{R}^E \times \mathbb{R}^B) \setminus S$ ,  $V_\theta = \psi^\theta(U_\theta)$  is open with respect to the topology induced on  $\Sigma_1^*$  by the standard topology of  $\mathbb{R}^{\mathcal{P} \times V_L}$ , is necessary to show that  $(V_\theta, (\psi^\theta)^{-1})_{\theta \in (\mathbb{R}^E \times \mathbb{R}^B) \setminus S}$  is an atlas of  $\Sigma_1^*$ .

**Proposition 23.** For any  $\theta \in (\mathbb{R}^E \times \mathbb{R}^B) \setminus S$ , for any  $\tau \in U_\theta$ , there exists  $\epsilon > 0$  such that

$$\Sigma_1^* \cap B_\infty(\psi^\theta(\tau), \epsilon) \subset V_\theta.$$

*Proof.* Let us first construct  $\epsilon$  and then consider an element of the set on the left of the inclusion and prove it belongs to  $V_\theta$ . Let  $\theta \in (\mathbb{R}^E \times \mathbb{R}^B) \setminus S$  and  $\tau \in U_\theta$ . For all  $l \in \llbracket 1, L-1 \rrbracket$ , for all  $v \in V_l$ , by definition of  $F_\theta$  and  $\rho_\theta$ , we have  $\rho_\theta(\tau)_{v \rightarrow s_{\max}^\theta(v)} = w_{v \rightarrow s_{\max}^\theta(v)}$ , and since  $\theta \notin S$ , by definition of  $s_{\max}^\theta$ ,  $w_{v \rightarrow s_{\max}^\theta(v)} \neq 0$ , so according to Lemma 22 there exists  $\epsilon_v > 0$  such that for all  $\tilde{\theta} \in \mathbb{R}^E \times \mathbb{R}^B$ ,

$$\|\phi(\rho_\theta(\tau)) - \phi(\tilde{\theta})\|_\infty < \epsilon_v \implies \tilde{w}_{v \rightarrow s_{\max}^\theta(v)} \neq 0.$$

Let  $\epsilon = \min_{v \in V_1 \cup \dots \cup V_{L-1}} \epsilon_v$ .

Let us now show the inclusion: let  $\tilde{\theta} \in (\mathbb{R}^E \times \mathbb{R}^B) \setminus S$  such that  $\|\phi(\rho_\theta(\tau)) - \phi(\tilde{\theta})\|_\infty < \epsilon$ , and let us show that  $\phi(\tilde{\theta}) \in V_\theta$ . Notice first that for all  $l \in \llbracket 1, L-1 \rrbracket$  and  $v \in V_l$ , by definition of  $\epsilon$ ,  $w_{v \rightarrow s_{\max}^\theta(v)} \neq 0$  and  $\tilde{w}_{v \rightarrow s_{\max}^\theta(v)} \neq 0$ . We are going to define  $\tilde{\tau} \in U_\theta$  such that  $\rho_\theta(\tilde{\tau}) \stackrel{R}{\sim} \tilde{\theta}$ , so that using Proposition 16  $\psi^\theta(\tilde{\tau}) = \phi(\tilde{\theta})$ .

Let us define recursively a family  $(\lambda^0, \dots, \lambda^L) \in (\mathbb{R}^*)^{V_0} \times \dots \times (\mathbb{R}^*)^{V_L}$  as follows:

- we define  $\lambda^L = \mathbf{1}_{V_L}$ ;
- for all  $l \in \llbracket 1, L-1 \rrbracket$ , for all  $v \in V_l$ , we define

$$\lambda_v^l = \frac{\tilde{w}_{v \rightarrow s_{\max}^\theta(v)}}{w_{v \rightarrow s_{\max}^\theta(v)}} \lambda_{s_{\max}^\theta(v)}^{l+1}. \quad (31)$$

- we define finally  $\lambda^0 = \mathbf{1}_{V_0}$ .

Note that for all  $l \in \llbracket 0, L \rrbracket$  and for all  $v \in V_l$ ,  $\lambda_v^l \neq 0$ . Also note that for all  $l \in \llbracket 2, L \rrbracket$ , for all  $v \in V_{l-1}$ , reformulating (31) in a way that will be useful later, we have

$$\frac{\lambda_{s_{\max}^\theta(v)}^l}{\lambda_v^{l-1}} = \frac{w_{v \rightarrow s_{\max}^\theta(v)}}{\tilde{w}_{v \rightarrow s_{\max}^\theta(v)}}. \quad (32)$$

We then define  $\tilde{\tau} \in \mathbb{R}^{F_\theta} \times \mathbb{R}^B$  by:

- for all  $l \in \llbracket 1, L \rrbracket$ , for all  $(v, v') \in (V_{l-1} \times V_l) \cap F_\theta$ ,

$$\tilde{\tau}_{v \rightarrow v'} = \frac{\lambda_{v'}^l}{\lambda_v^{l-1}} \tilde{w}_{v \rightarrow v'}; \quad (33)$$

- for all  $l \in \llbracket 1, L \rrbracket$ , for all  $v \in V_l$ ,

$$\tilde{\tau}_v = \lambda_v^l \tilde{b}_v. \quad (34)$$

Let us show  $\rho_\theta(\tilde{\tau}) \stackrel{R}{\sim} \tilde{\theta}$ . Indeed, let  $l \in \llbracket 1, L \rrbracket$  and let  $(v, v') \in V_{l-1} \times V_l$ . If  $v \in V_0$  or  $v \in V_1 \cup \dots \cup V_{L-1}$  and  $v' \neq s_{\max}^\theta(v)$ , then by definition (8) of  $F_\theta$ , we have  $v \rightarrow v' \in F_\theta$ , so using (9) and (33) we have

$$\rho_\theta(\tilde{\tau})_{v \rightarrow v'} = \tilde{\tau}_{v \rightarrow v'} = \frac{\lambda_{v'}^l}{\lambda_v^{l-1}} \tilde{w}_{v \rightarrow v'}. \quad (35)$$

If  $v \in V_1 \cup \dots \cup V_{L-1}$  and  $v' = s_{\max}^\theta(v)$ , then by definition (8) of  $F_\theta$ , we have  $v \rightarrow v' \in E \setminus F_\theta$ , and since in that case,  $l \geq 2$ , using (9) and (32), we see that

$$\rho_\theta(\tilde{\tau})_{v \rightarrow v'} = w_{v \rightarrow v'} = \frac{\lambda_{v'}^l}{\lambda_v^{l-1}} \tilde{w}_{v \rightarrow v'}. \quad (36)$$

If  $v \in B$ , using (9) and (34), we have

$$\rho_\theta(\tilde{\tau})_v = \tilde{\tau}_v = \lambda_v^l \tilde{b}_v. \quad (37)$$

Equations (35), (36) and (37) prove that

$$\rho_\theta(\tilde{\tau}) \stackrel{R}{\sim} \tilde{\theta}.$$

Using Corollary 17, since  $\tilde{\theta} \in (\mathbb{R}^E \times \mathbb{R}^B) \setminus S$  and  $\rho_\theta(\tilde{\tau}) \stackrel{R}{\sim} \tilde{\theta}$ , we also have  $\rho_\theta(\tilde{\tau}) \in (\mathbb{R}^E \times \mathbb{R}^B) \setminus S$ . Since, by definition,  $U_\theta = \rho_\theta^{-1}((\mathbb{R}^E \times \mathbb{R}^B) \setminus S)$ , we have  $\tilde{\tau} \in U_\theta$ . We have shown

$$\Sigma_1^* \cap B_\infty(\psi^\theta(\tau), \epsilon) \subset V_\theta.$$

□

The following proposition is necessary in order to show that  $(V_\theta, (\psi^\theta)^{-1})_{\theta \in (\mathbb{R}^E \times \mathbb{R}^B) \setminus S}$  is an atlas of  $\Sigma_1^*$ .

**Proposition 24.** *For all  $\theta \in (\mathbb{R}^E \times \mathbb{R}^B) \setminus S$ , the function  $\psi^\theta$  is  $C^\infty$  and its differential  $D\psi^\theta(\tau)$  is injective for all  $\tau \in U_\theta$ .*

*Proof.* Let  $\theta \in (\mathbb{R}^E \times \mathbb{R}^B) \setminus S$ . First of all,  $\psi^\theta$  is a polynomial function as a composition of  $\phi$  and  $\rho_\theta$  which are both polynomial functions. So,  $\psi^\theta$  is  $C^\infty$ .

In order to show the injectivity of the differential  $D\psi^\theta(\tau)$  for all  $\tau \in U_\theta$ , let us compute the partial derivatives of  $\psi_{p, v_L}^\theta(\tau)$ . Let  $p \in \mathcal{P}$  and  $v_L \in V_L$ . Using the definition of  $\psi^\theta$  and  $\phi$ , three cases are possible.

Case 1. The path  $p$  is of the form  $(v_0, v_1, \dots, v_{L-1})$ . We have

$$\psi_{p, v_L}^\theta(\tau) = \rho_\theta(\tau)_{v_0 \rightarrow v_1} \cdots \rho_\theta(\tau)_{v_{L-1} \rightarrow v_L}.$$

Case 2. The path  $p$  is of the form  $(v_l, \dots, v_{L-1})$  with  $l \in \llbracket 1, L-1 \rrbracket$ . We have, for all  $\tau \in U_\theta$ ,

$$\psi_{p, v_L}^\theta(\tau) = \tau_{v_l} \rho_\theta(\tau)_{v_l \rightarrow v_{l+1}} \cdots \rho_\theta(\tau)_{v_{L-1} \rightarrow v_L}.$$

Case 3. For  $p = \beta$ , we have, for all  $\tau \in U_\theta$ ,

$$\psi_{p, v_L}^\theta(\tau) = \tau_{v_L}.$$

Let  $(v, v') \in F_\theta$ , and let us compute  $\frac{\partial \psi_{p, v_L}^\theta}{\partial \tau_{v \rightarrow v'}}(\tau)$ .

Case 1. We have  $p = (v_0, \dots, v_{L-1}) \in \mathcal{P}_0$ . If  $\{v, v'\} \subset \{v_0, \dots, v_L\}$ , there exists  $l \in \llbracket 0, L-1 \rrbracket$  such that  $(v, v') = (v_l, v_{l+1})$ , in which case, since  $(v, v') \in F_\theta$ ,  $\rho_\theta(\tau)_{v_l \rightarrow v_{l+1}} = \tau_{v_l \rightarrow v_{l+1}}$  and

$$\frac{\partial \psi_{p, v_L}^\theta}{\partial \tau_{v \rightarrow v'}}(\tau) = \prod_{\substack{k \in \llbracket 0, L-1 \rrbracket \\ k \neq l}} \rho_\theta(\tau)_{v_k \rightarrow v_{k+1}}. \quad (38)$$

Otherwise if  $\{v, v'\} \not\subset \{v_0, \dots, v_L\}$ ,

$$\frac{\partial \psi_{p, v_L}^\theta}{\partial \tau_{v \rightarrow v'}}(\tau) = 0.$$

Case 2. We have  $p = (v_l, \dots, v_{L-1}) \in \mathcal{P}_l$ , for  $l \in \llbracket 1, L-1 \rrbracket$ . If  $\{v, v'\} \subset \{v_l, \dots, v_L\}$ , there exists  $l' \in \llbracket l, L-1 \rrbracket$  such that  $(v, v') = (v_{l'}, v_{l'+1})$ , in which case, since  $(v, v') \in F_\theta$ ,  $\rho_\theta(\tau)_{v_{l'} \rightarrow v_{l'+1}} = \tau_{v_{l'} \rightarrow v_{l'+1}}$  and

$$\frac{\partial \psi_{p, v_L}^\theta}{\partial \tau_{v \rightarrow v'}}(\tau) = \tau_{v_l} \prod_{\substack{k \in \llbracket l, L-1 \rrbracket \\ k \neq l'}} \rho_\theta(\tau)_{v_k \rightarrow v_{k+1}}. \quad (39)$$

Otherwise if  $\{v, v'\} \not\subset \{v_l, \dots, v_L\}$ ,

$$\frac{\partial \psi_{p, v_L}^\theta}{\partial \tau_{v \rightarrow v'}}(\tau) = 0.$$

Case 3. We have  $p = \beta$ . In that case, we have

$$\frac{\partial \psi_{p,v_L}^\theta}{\partial \tau_{v \rightarrow v'}}(\tau) = 0.$$

Now let  $v \in B$ , and let us compute  $\frac{\partial \psi_{p,v_L}^\theta}{\partial \tau_v}(\tau)$ .

Case 1. We have  $p = (v_0, \dots, v_{L-1}) \in \mathcal{P}_0$  and

$$\frac{\partial \psi_{p,v_L}^\theta}{\partial \tau_v}(\tau) = 0.$$

Case 2. We have  $p = (v_l, \dots, v_{L-1}) \in \mathcal{P}_l$  for  $l \in \llbracket 1, L-1 \rrbracket$ . If  $v = v_l$ , then

$$\frac{\partial \psi_{p,v_L}^\theta}{\partial \tau_v}(\tau) = \prod_{k \in \llbracket l, L-1 \rrbracket} \rho_\theta(\tau)_{v_k \rightarrow v_{k+1}}.$$

If  $v \neq v_l$ ,

$$\frac{\partial \psi_{p,v_L}^\theta}{\partial \tau_v}(\tau) = 0.$$

Case 3. We have  $p = \beta$  and

$$\frac{\partial \psi_{p,v_L}^\theta}{\partial \tau_v}(\tau) = \begin{cases} 1 & \text{if } v = v_L \\ 0 & \text{if } v \neq v_L. \end{cases}$$

Now that we know the partial derivatives, let us show  $D\psi^\theta(\tau)$  is injective for all  $\tau \in U_\theta$ . Let  $\tau \in U_\theta$  and let  $h \in \mathbb{R}^{F_\theta} \times \mathbb{R}^B$  such that

$$D\psi^\theta(\tau) \cdot h = 0.$$

We need to prove that  $h = 0$ .

Let us show first that for all  $v \in B$ ,  $h_v = 0$ . Let  $l \in \llbracket 1, L-1 \rrbracket$ , and let  $v_l \in V_l$  so that  $v_l$  is arbitrary in  $B \setminus V_L$ . Let us define  $v_{l+1} = s_{\max}^\theta(v_l)$ , then  $v_{l+2} = s_{\max}^\theta(v_{l+1})$ , and so on up to  $v_L = s_{\max}^\theta(v_{L-1})$ . Let us denote  $p = (v_l, \dots, v_{L-1})$ . We have

$$\psi_{p,v_L}^\theta(\tau) = \tau_{v_l} w_{v_l \rightarrow v_{l+1}} \dots w_{v_{L-1} \rightarrow v_L},$$

so

$$[D\psi^\theta(\tau) \cdot h]_{p,v_L} = \frac{\partial \psi_{p,v_L}^\theta}{\partial \tau_{v_l}}(\tau) h_{v_l} = w_{v_l \rightarrow v_{l+1}} \dots w_{v_{L-1} \rightarrow v_L} h_{v_l}.$$

Since  $[D\psi^\theta(\tau) \cdot h]_{p,v_L} = 0$  and  $w_{v_l \rightarrow v_{l+1}} \dots w_{v_{L-1} \rightarrow v_L} \neq 0$ , we conclude that  $h_{v_l} = 0$ . Now let  $v_L \in V_L$ . We consider  $p = \beta$  and we have

$$[D\psi^\theta(\tau) \cdot h]_{p,v_L} = h_{v_L}.$$

Since  $[D\psi^\theta(\tau) \cdot h]_{p,v_L} = 0$ , we also conclude in that case that  $h_{v_L} = 0$ .

Let us now show that for all  $(v, v') \in F_\theta$ ,  $h_{v \rightarrow v'} = 0$ . Let  $l \in \llbracket 1, L \rrbracket$  and let  $(v_{l-1}, v_l) \in (V_{l-1} \times V_l) \cap F_\theta$  so that  $(v_{l-1}, v_l)$  is arbitrary in  $F_\theta$ . If  $l = 1$ , we define  $p_i = (v_{l-1})$  and we have by convention  $\theta_{p_i} = 1 \neq 0$ . If  $l > 1$ , using Proposition [15](#) there exist  $l' \in \llbracket 0, l-1 \rrbracket$  and a path  $p_i = (v_{l'}, \dots, v_{l-1})$  such that  $\rho_\theta(\tau)_{p_i} \neq 0$ . If  $l < L$ , we define  $v_{l+1} = s_{\max}^\theta(v_l)$ , then  $v_{l+2} = s_{\max}^\theta(v_{l+1})$ , and so on up to  $v_L = s_{\max}^\theta(v_{L-1})$ , and we denote  $p = p_i \cup (v_{l-1}, v_l, \dots, v_{L-1})$ . If  $l = L$ , we denote  $p = p_i$ . Let us show the following expression.

$$[D\psi^\theta(\tau) \cdot h]_{p,v_L} = \sum_{\substack{k \in \llbracket l', l-1 \rrbracket \\ (v_k, v_{k+1}) \in F_\theta}} \frac{\partial \psi_{p,v_L}^\theta}{\partial \tau_{v_k \rightarrow v_{k+1}}}(\tau) h_{v_k \rightarrow v_{k+1}} \quad (40)$$

Indeed, if  $l' \geq 1$ , we have

$$\psi_{p,v_L}^\theta(\tau) = \tau_{v_{l'}} \prod_{k=l'}^{l-1} \rho_\theta(\tau)_{v_k \rightarrow v_{k+1}} \prod_{k=l}^{L-1} w_{v_k \rightarrow v_{k+1}},$$

with the classical convention that if  $l = L$ , the product on the right is empty thus equal to 1. We thus have

$$\begin{aligned} [D\psi^\theta(\tau) \cdot h]_{p,v_L} &= \frac{\partial \psi_{p,v_L}^\theta(\tau)}{\partial \tau_{v_{l'}}} h_{v_{l'}} + \sum_{\substack{k \in \llbracket l', l-1 \rrbracket \\ (v_k, v_{k+1}) \in F_\theta}} \frac{\partial \psi_{p,v_L}^\theta(\tau)}{\partial \tau_{v_k \rightarrow v_{k+1}}} h_{v_k \rightarrow v_{k+1}} \\ &= \sum_{\substack{k \in \llbracket l', l-1 \rrbracket \\ (v_k, v_{k+1}) \in F_\theta}} \frac{\partial \psi_{p,v_L}^\theta(\tau)}{\partial \tau_{v_k \rightarrow v_{k+1}}} h_{v_k \rightarrow v_{k+1}}, \end{aligned}$$

since we have already shown that  $h_{v_{l'}} = 0$ .

If  $l' = 0$ , we have

$$\psi_{p,v_L}^\theta(\tau) = \prod_{k=0}^{l-1} \rho_\theta(\tau)_{v_k \rightarrow v_{k+1}} \prod_{k=l}^{L-1} w_{v_k \rightarrow v_{k+1}},$$

with the same convention that when  $l = L$  the product on the right is equal to 1, so again

$$[D\psi^\theta(\tau) \cdot h]_{p,v_L} = \sum_{\substack{k \in \llbracket 0, l-1 \rrbracket \\ (v_k, v_{k+1}) \in F_\theta}} \frac{\partial \psi_{p,v_L}^\theta(\tau)}{\partial \tau_{v_k \rightarrow v_{k+1}}} h_{v_k \rightarrow v_{k+1}}.$$

This concludes the proof of (40).

We can now show by induction the following statement, for  $l \in \llbracket 0, L \rrbracket$ .

$$\forall l' \in \llbracket 1, l \rrbracket, \forall (v, v') \in (V_{l'-1} \times V_{l'}) \cap F_\theta, h_{v \rightarrow v'} = 0. \quad (H_l)$$

Since  $\llbracket 1, 0 \rrbracket = \emptyset$ ,  $H_0$  is trivially true. Now let  $l \in \llbracket 1, L \rrbracket$  and suppose  $H_{l-1}$  is true. We consider  $(v_{l-1}, v_l) \in (V_{l-1} \times V_l) \cap F_\theta$ , and  $l' \in \llbracket 0, l \rrbracket$ ,  $p_i$  and  $p$  just as before. Since for all  $k \in \llbracket 0, l-2 \rrbracket$ , the induction hypothesis guarantees that  $h_{v_k \rightarrow v_{k+1}} = 0$ , (40) becomes

$$[D\psi^\theta(\tau) \cdot h]_{p,v_L} = \frac{\partial \psi_{p,v_L}^\theta(\tau)}{\partial \tau_{v_{l-1} \rightarrow v_l}} h_{v_{l-1} \rightarrow v_l}.$$

Using (38) and (39), we obtain

$$[D\psi^\theta(\tau) \cdot h]_{p,v_L} = \begin{cases} \rho_\theta(\tau)_{p_i} w_{v_l \rightarrow v_{l+1}} \cdots w_{v_{L-1} \rightarrow v_L} h_{v_{l-1} \rightarrow v_l} & \text{if } l < L \\ \rho_\theta(\tau)_{p_i} h_{v_{l-1} \rightarrow v_l} & \text{if } l = L. \end{cases}$$

Since  $\rho_\theta(\tau)_{p_i} \neq 0$ , and for  $l < L$ ,  $w_{v_l \rightarrow v_{l+1}} \cdots w_{v_{L-1} \rightarrow v_L} \neq 0$ , we conclude that  $h_{v_{l-1} \rightarrow v_l} = 0$  and that  $H_l$  holds.

This induction leads to the conclusion that  $h = 0$  and  $D\psi^\theta(\tau)$  is injective.  $\square$

We are now equipped to prove Theorem 7 which we restate here.

**Theorem 25.**  $\Sigma_1^1$  is a smooth manifold of  $\mathbb{R}^{\mathcal{P} \times V_L}$  of dimension

$$|F_\theta| + |B| = N_0 N_1 + N_1 N_2 + \cdots + N_{L-1} N_L + N_L,$$

and the family  $(V_\theta, (\psi^\theta)^{-1})_{\theta \in (\mathbb{R}^E \times \mathbb{R}^B) \setminus S}$  is an atlas.

*Proof.* Our goal is to show that the family  $(V_\theta, (\psi^\theta)^{-1})_{\theta \in (\mathbb{R}^E \times \mathbb{R}^B) \setminus S}$  is a smooth atlas, which will show that  $\Sigma_1^1$  is a smooth manifold.

We already know from Proposition 23 that for any  $\theta \in (\mathbb{R}^E \times \mathbb{R}^B) \setminus S$ ,  $V_\theta$  is an open subset of  $\Sigma_1^1$  and from Proposition 21 that  $(\psi^\theta)^{-1}$  is a homeomorphism from  $V_\theta$  onto  $U_\theta$ . Since for any

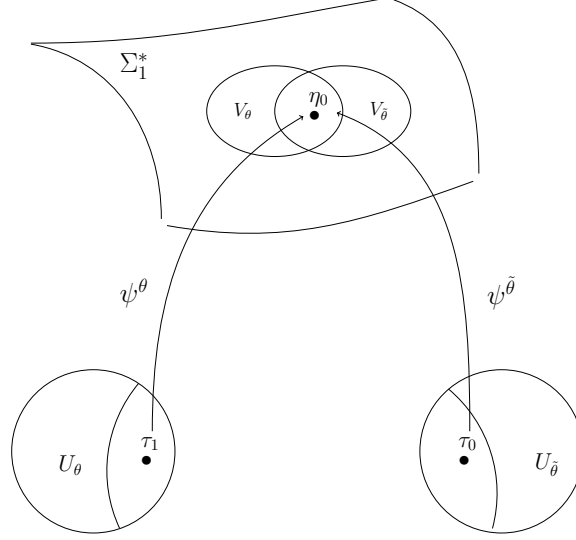

Figure 3: The points  $\eta_0, \tau_0, \tau_1$  and the inverse charts  $\psi^\theta$  and  $\psi^{\tilde{\theta}}$ .

$\theta \in (\mathbb{R}^E \times \mathbb{R}^B) \setminus S$ ,  $\tau_\theta \in U_\theta$ , we have  $\phi(\theta) = \psi^\theta(\tau_\theta) \in V_\theta$  which shows that  $(V_\theta)_{\theta \in (\mathbb{R}^E \times \mathbb{R}^B) \setminus S}$  covers  $\Sigma_1^*$ .

Let  $\theta, \tilde{\theta} \in (\mathbb{R}^E \times \mathbb{R}^B) \setminus S$ , let us show that the transition map

$$(\psi^\theta)^{-1} \circ \psi^{\tilde{\theta}} : (\psi^{\tilde{\theta}})^{-1}(V_\theta \cap V_{\tilde{\theta}}) \rightarrow (\psi^\theta)^{-1}(V_\theta \cap V_{\tilde{\theta}})$$

is smooth.

Let  $\tau_0 \in U_{\tilde{\theta}}$  such that  $\tau_0 \in (\psi^{\tilde{\theta}})^{-1}(V_\theta \cap V_{\tilde{\theta}})$ . We are going to show that the function  $(\psi^\theta)^{-1} \circ \psi^{\tilde{\theta}}$  is  $C^\infty$  in a neighborhood of  $\tau_0$ .

For ease of reading, let us denote  $\psi^{\tilde{\theta}}(\tau_0)$  by  $\eta_0$ . By definition,  $\eta_0 \in V_\theta \cap V_{\tilde{\theta}}$ . In particular, since  $\eta_0 \in V_\theta$ , we can define  $\tau_1 = (\psi^\theta)^{-1}(\eta_0)$ . See Figure 3 for a representation.

Let  $T = \text{Im } D\psi^\theta(\tau_1)$ , and let us consider a linear subspace  $G$  such that  $T \oplus G = \mathbb{R}^{\mathcal{P} \times V_L}$ . Let  $N_C = |\mathcal{P}|N_L - |F_\theta| - |B| = \dim(G)$ . Let  $i : \mathbb{R}^{N_C} \rightarrow G$  be linear and invertible. Let us consider the function

$$\begin{aligned} \varphi_\theta : U_\theta \times \mathbb{R}^{N_C} &\longrightarrow \mathbb{R}^{\mathcal{P} \times V_L} \\ (\tau, x) &\longmapsto \psi^\theta(\tau) + i(x). \end{aligned}$$

We are going to show that there exist an open neighborhood  $\tilde{U}$  of  $(\tau_1, 0)$  in  $(\mathbb{R}^{F_\theta} \times \mathbb{R}^B) \times \mathbb{R}^{N_C}$  and an open neighborhood  $\tilde{V}$  of  $\eta_0$  in  $\mathbb{R}^{\mathcal{P} \times V_L}$  such that  $\varphi_\theta$  is a  $C^\infty$  diffeomorphism from  $\tilde{U}$  onto  $\tilde{V}$  satisfying

$$\varphi_\theta \left( [(\mathbb{R}^{F_\theta} \times \mathbb{R}^B) \times \{0\}^{N_C}] \cap \tilde{U} \right) = \Sigma_1^* \cap \tilde{V}.$$

Let us first show that  $\varphi_\theta$  is a  $C^\infty$ -diffeomorphism from a neighborhood of  $(\tau_1, 0)$  in  $(\mathbb{R}^{F_\theta} \times \mathbb{R}^B) \times \mathbb{R}^{N_C}$  onto a neighborhood of  $\eta_0$  in  $\mathbb{R}^{\mathcal{P} \times V_L}$ . As shown in Proposition 24,  $\psi^\theta$  is  $C^\infty$  and  $i$  is a linear function, so  $\varphi_\theta$  is  $C^\infty$ . Let us prove that the differential  $D\varphi_\theta(\tau_1, 0)$  is injective. For all  $(\tau, x) \in (\mathbb{R}^{F_\theta} \times \mathbb{R}^B) \times \mathbb{R}^{N_C}$ ,

$$D\varphi_\theta(\tau_1, 0) \cdot (\tau, x) = D\psi^\theta(\tau_1) \cdot \tau + i(x).$$

Since  $D\psi^\theta(\tau_1) \cdot \tau \in T$ ,  $i(x) \in G$ , and  $T$  and  $G$  are in direct sum, if  $D\varphi_\theta(\tau_1, 0) \cdot (\tau, x) = 0$ , then we have

$$\begin{cases} D\psi^\theta(\tau_1) \cdot \tau = 0 \\ i(x) = 0. \end{cases}$$

Since as shown in Proposition 24  $D\psi^\theta(\tau_1)$  is injective, and since  $i$  is invertible, we have

$$(\tau, x) = (0, 0).$$

Hence,  $D\varphi_\theta(\tau_1, 0)$  is injective. Since  $\dim((\mathbb{R}^{F_\theta} \times \mathbb{R}^B) \times \mathbb{R}^{N_C}) = |F_\theta| + |B| + N_C = |\mathcal{P}|N_L$ , the differential  $D\varphi_\theta(\tau_1, 0)$  is bijective. Using the inverse function theorem, there exists an open set  $U \subset U_\theta \times \mathbb{R}^{N_C}$  containing  $(\tau_1, 0)$ , an open set  $V \subset \mathbb{R}^{\mathcal{P} \times V_L}$  containing  $\eta_0$  such that  $\varphi_\theta$  is a  $C^\infty$ -diffeomorphism from  $U$  onto  $V$ .

We have

$$\varphi_\theta\left([\mathbb{R}^{F_\theta} \times \mathbb{R}^B] \times \{0\}^{N_C}\right] \cap U \subset V_\theta \cap V.$$

In fact, if  $V$  is small enough, this inclusion is an equality. We are going to construct open subsets  $\tilde{U} \subset U$  and  $\tilde{V} \subset V$  so that it is the case. Let us define

$$O = \{\tau \in U_\theta, (\tau, 0) \in U\}.$$

Since  $U$  is an open set containing  $(\tau_1, 0)$ ,  $O$  is an open set containing  $\tau_1 = (\psi^\theta)^{-1}(\eta_0)$ . Since, according to Proposition 21,  $\psi^\theta$  is a homeomorphism,  $\psi^\theta(O)$  is an open subset of  $V_\theta$  so there exists  $\epsilon > 0$  such that

$$V_\theta \cap B_\infty(\eta_0, \epsilon) \subset \psi^\theta(O). \quad (41)$$

We can now define  $\tilde{V} = V \cap B_\infty(\eta_0, \epsilon)$ , and  $\tilde{U} = \{(\tau, x) \in U, \varphi_\theta(\tau, x) \in \tilde{V}\}$ , which are open sets such that  $(\tau_1, 0) \in \tilde{U}$ ,  $\eta_0 \in \tilde{V}$ , and  $\varphi_\theta$  is a  $C^\infty$ -diffeomorphism from  $\tilde{U}$  onto  $\tilde{V}$ . Let us show that

$$\varphi_\theta\left([\mathbb{R}^{F_\theta} \times \mathbb{R}^B] \times \{0\}^{N_C}\right] \cap \tilde{U} = V_\theta \cap \tilde{V}. \quad (42)$$

The direct inclusion is immediate: if  $(\tau, 0) \in [\mathbb{R}^{F_\theta} \times \mathbb{R}^B] \times \{0\}^{N_C} \cap \tilde{U}$ , then

$$\varphi_\theta(\tau, 0) = \psi^\theta(\tau) \in V_\theta \cap \tilde{V}.$$

For the reciprocal inclusion, if  $\tau \in U_\theta$  is such that  $\psi^\theta(\tau) \in V_\theta \cap \tilde{V}$ , then by definition of  $\epsilon$  and  $\tilde{V}$ , (41) guarantees, since  $\psi^\theta$  is injective, that  $\tau \in O$ . By definition of  $O$ , we have  $(\tau, 0) \in U$ , and since

$$\varphi_\theta(\tau, 0) = \psi^\theta(\tau) \in \tilde{V},$$

this shows  $(\tau, 0) \in \tilde{U}$ . This shows the reciprocal inclusion, and thus (42) holds.

Let us now define

$$\begin{aligned} P_\theta : \mathbb{R}^{F_\theta} \times \mathbb{R}^B \times \mathbb{R}^{N_C} &\longrightarrow \mathbb{R}^{F_\theta} \times \mathbb{R}^B \\ (\tau, x) &\longmapsto \tau \end{aligned}$$

the restriction to the first component, and let us observe that over  $V_\theta \cap \tilde{V}$ , we have

$$P_\theta \circ (\varphi_\theta)^{-1} = (\psi^\theta)^{-1}. \quad (43)$$

Indeed, if  $\eta \in V_\theta \cap \tilde{V}$ , then by (42) there exists  $\tau \in U_\theta$  such that  $(\tau, 0) \in \tilde{U}$  and  $\varphi_\theta(\tau, 0) = \eta$ . Since  $\varphi_\theta(\tau, 0) = \psi^\theta(\tau)$ , this shows that  $\tau = (\psi^\theta)^{-1}(\eta)$  and thus

$$(\psi^\theta)^{-1}(\eta) = P_\theta(\tau, 0) = P_\theta \circ (\varphi_\theta)^{-1}(\eta).$$

Now recall that  $\eta_0 = \psi^{\tilde{\theta}}(\tau_0)$ . By continuity of  $\psi^{\tilde{\theta}}$ , there exists  $\epsilon' > 0$  such that  $B_\infty(\tau_0, \epsilon') \subset (\psi^{\tilde{\theta}})^{-1}(V_\theta \cap V_{\tilde{\theta}})$  and

$$\psi^{\tilde{\theta}}(B_\infty(\tau_0, \epsilon')) \subset \tilde{V}.$$

For any  $\tau \in B_\infty(\tau_0, \epsilon')$ , we have  $\psi^{\tilde{\theta}}(\tau) \in V_\theta \cap \tilde{V}$  so, as we just proved with (43),  $(\psi^\theta)^{-1} \circ \psi^{\tilde{\theta}}(\tau) = P_\theta \circ (\varphi_\theta)^{-1} \circ \psi^{\tilde{\theta}}(\tau)$ . Since the functions  $\psi^{\tilde{\theta}}$ ,  $(\varphi_\theta)^{-1}$  and  $P_\theta$  are all  $C^\infty$ , we conclude that the transition map  $(\psi^\theta)^{-1} \circ \psi^{\tilde{\theta}}$  is  $C^\infty$  over  $B_\infty(\tau_0, \epsilon')$ , for all  $\tau_0 \in (\psi^{\tilde{\theta}})^{-1}(V_\theta \cap V_{\tilde{\theta}})$ . We conclude that  $(\psi^\theta)^{-1} \circ \psi^{\tilde{\theta}}$  is  $C^\infty$  over  $(\psi^{\tilde{\theta}})^{-1}(V_\theta \cap V_{\tilde{\theta}})$ .

We have showed that  $(V_\theta, (\psi^\theta)^{-1})_{\theta \in (\mathbb{R}^E \times \mathbb{R}^B) \setminus S}$  is a smooth atlas, and thus that  $\Sigma_1^*$  is a smooth submanifold of  $\mathbb{R}^{\mathcal{P} \times V_L}$ . As computed in (21), its dimension is

$$|F_\theta| + |B| = N_0 N_1 + N_1 N_2 + \cdots + N_{L-1} N_L + N_L.$$

□

## D Conditions of local identifiability

Let us restate (using Definition 6) and prove Theorem 8

**Theorem 26.** For any  $X \in \mathbb{R}^{n \times V_0}$  and  $\theta \in (\mathbb{R}^E \times \mathbb{R}^B) \setminus (S \cup \Delta_X)$ , the two following statements are equivalent.

- i)  $\theta$  is locally identifiable from  $X$ .
- ii) There exists  $\epsilon > 0$  such that  $B_\infty(\phi(\theta), \epsilon) \cap \Sigma_1^* \cap N(X, \theta) = \{\phi(\theta)\}$ .

*Proof.*

$i) \Rightarrow ii)$  Suppose  $i)$  is satisfied for some  $\epsilon_1 > 0$ . We first construct  $\epsilon' > 0$  and then consider  $\eta \in B_\infty(\phi(\theta), \epsilon') \cap \Sigma_1^* \cap N(X, \theta)$ , and we prove that  $\eta = \phi(\theta)$ . Since  $\theta \in (\mathbb{R}^E \times \mathbb{R}^B) \setminus (S \cup \Delta_X)$  and since, according to Proposition 14,  $\Delta_X$  is closed, there exists  $\epsilon_2 > 0$  such that for any  $\tilde{\theta} \in B_\infty(\theta, \epsilon_2)$ ,

$$\alpha(X, \theta) = \alpha(X, \tilde{\theta}),$$

i.e.

$$A(X, \theta) = A(X, \tilde{\theta}).$$

Consider  $\epsilon = \min(\epsilon_1, \epsilon_2)$ . Since, according to Proposition 21,  $\rho_\theta \circ (\psi^\theta)^{-1}$  is continuous at  $\phi(\theta) \in \psi^\theta(U_\theta)$ , and since  $\rho_\theta \circ (\psi^\theta)^{-1}(\phi(\theta)) = \rho_\theta(\tau_\theta) = \theta$ , there exists  $\epsilon' > 0$  such that for all  $\tau \in U_\theta$ ,

$$\|\psi^\theta(\tau) - \phi(\theta)\|_\infty < \epsilon' \implies \|\rho_\theta(\tau) - \theta\|_\infty = \|\rho_\theta \circ (\psi^\theta)^{-1}(\psi^\theta(\tau)) - \rho_\theta \circ (\psi^\theta)^{-1}(\phi(\theta))\|_\infty < \epsilon. \quad (44)$$

Since  $\phi(\theta) = \psi^\theta(\tau_\theta)$ , Proposition 23 guarantees that, modulo a decrease of  $\epsilon'$ , we can assume that

$$B_\infty(\phi(\theta), \epsilon') \cap \Sigma_1^* \subset \psi^\theta(U_\theta). \quad (45)$$

Now let  $\eta \in B_\infty(\phi(\theta), \epsilon') \cap \Sigma_1^* \cap N(X, \theta)$ . Let us prove that  $\eta = \phi(\theta)$ . Using (45), there exists  $\tau \in U_\theta$  such that  $\eta = \psi^\theta(\tau)$ . Since  $\|\phi(\theta) - \eta\|_\infty < \epsilon'$ , we have using (44)

$$\|\rho_\theta(\tau) - \theta\|_\infty < \epsilon. \quad (46)$$

Since  $\epsilon < \epsilon_2$ , we have

$$A(X, \theta) = A(X, \rho_\theta(\tau)). \quad (47)$$

Since  $\psi^\theta(\tau) = \eta \in N(X, \theta)$ , we have by definition of  $N(X, \theta)$  that  $\psi^\theta(\tau) - \phi(\theta) \in \text{Ker } A(X, \theta)$ , so

$$A(X, \theta) \cdot \psi^\theta(\tau) = A(X, \theta) \cdot \phi(\theta) \quad (48)$$

Using successively (3), (47), (48) and (3) again, we have

$$\begin{aligned} f_{\rho_\theta(\tau)}(X) &= A(X, \rho_\theta(\tau)) \cdot \phi(\rho_\theta(\tau)) \\ &= A(X, \theta) \cdot \phi(\rho_\theta(\tau)) \\ &= A(X, \theta) \cdot \phi(\theta) \\ &= f_\theta(X). \end{aligned}$$

Since the hypothesis  $i)$  holds for  $\epsilon_1$ , using (46) and the fact that  $\epsilon < \epsilon_1$ , we have

$$\theta \sim \rho_\theta(\tau).$$

We conclude using Proposition 16 that

$$\eta = \phi(\rho_\theta(\tau)) = \phi(\theta),$$

which shows

$$B_\infty(\phi(\theta), \epsilon') \cap \Sigma_1^* \cap N(X, \theta) \subset \{\phi(\theta)\}.$$

The converse inclusion trivially holds and therefore  $ii)$  holds.

ii)  $\Rightarrow$  i) Suppose ii) is satisfied for some  $\epsilon' > 0$ .

We first construct  $\epsilon$  and prove i) holds. Since  $\theta \in (\mathbb{R}^E \times \mathbb{R}^B) \setminus (S \cup \Delta_X)$ , using Proposition 14, there exists  $\epsilon_1 > 0$  such that for all  $\tilde{\theta} \in B_\infty(\theta, \epsilon_1)$ ,

$$\alpha(X, \theta) = \alpha(X, \tilde{\theta}),$$

i.e.

$$A(X, \theta) = A(X, \tilde{\theta}). \quad (49)$$

Since  $\phi$  is continuous, there exists  $\epsilon_2 > 0$  such that

$$\|\theta - \tilde{\theta}\|_\infty < \epsilon_2 \implies \|\phi(\theta) - \phi(\tilde{\theta})\|_\infty < \epsilon'.$$

Using Proposition 19, there exists  $\epsilon_3 > 0$  such that

$$\theta \stackrel{R}{\sim} \tilde{\theta} \text{ and } \|\theta - \tilde{\theta}\|_\infty < \epsilon_3 \implies \theta \sim \tilde{\theta}.$$

Since  $\theta \notin S$  and  $S$  is closed, there exists  $\epsilon_4 > 0$  such that for all  $\tilde{\theta} \in \mathbb{R}^E \times \mathbb{R}^B$ , if  $\|\theta - \tilde{\theta}\|_\infty < \epsilon_4$ , then

$$\tilde{\theta} \notin S.$$

Let  $\epsilon = \min(\epsilon_1, \epsilon_2, \epsilon_3, \epsilon_4)$ . Let  $\tilde{\theta} \in B_\infty(\theta, \epsilon)$ , and suppose

$$f_\theta(X) = f_{\tilde{\theta}}(X).$$

Let us prove that  $\theta \sim \tilde{\theta}$ . Reformulating the above equality using (3) for both sides, and using the definition of  $A$  given in the beginning of Section 4, we have

$$A(X, \theta) \cdot \phi(\theta) = A(X, \tilde{\theta}) \cdot \phi(\tilde{\theta}).$$

Since  $\|\theta - \tilde{\theta}\|_\infty < \epsilon \leq \epsilon_1$ , we have the equality (49) and thus

$$A(X, \theta) \cdot \phi(\theta) = A(X, \theta) \cdot \phi(\tilde{\theta}).$$

In other words,  $\phi(\tilde{\theta}) - \phi(\theta) \in \text{Ker } A(X, \theta)$ . Since  $\epsilon < \epsilon_4$ ,  $\phi(\tilde{\theta}) \in \Sigma_1^*$ . Since  $\epsilon < \epsilon_2$ ,  $\phi(\tilde{\theta}) \in B_\infty(\phi(\theta), \epsilon')$ . Summarizing,

$$\phi(\tilde{\theta}) \in B_\infty(\phi(\theta), \epsilon') \cap \Sigma_1^* \cap N(X, \theta),$$

and using the hypothesis ii), we conclude that

$$\phi(\tilde{\theta}) = \phi(\theta).$$

By Proposition 18, we have  $\theta \stackrel{R}{\sim} \tilde{\theta}$ , and since  $\epsilon < \epsilon_3$ , we conclude that

$$\theta \sim \tilde{\theta}.$$

□

We are now going to prove Theorems 9 and 10, which we restate as Theorems 27 and 28 respectively (using Definition 6).

**Theorem 27** (Necessary condition). *Let  $X \in \mathbb{R}^{n \times V_0}$  and  $\theta \in (\mathbb{R}^E \times \mathbb{R}^B) \setminus (S \cup \Delta_X)$ . If  $C_N$  is not satisfied, then  $\theta$  is not locally identifiable from  $X$  (thus not globally identifiable).*

**Theorem 28** (Sufficient condition). *Let  $X \in \mathbb{R}^{n \times V_0}$  and  $\theta \in (\mathbb{R}^E \times \mathbb{R}^B) \setminus (S \cup \Delta_X)$ . If  $C_S$  is satisfied, then  $\theta$  is locally identifiable from  $X$ .*

To prove the theorems, we need to prove first the following lemmas.

**Lemma 29.** Let us denote by  $T = \text{Im } D\psi^\theta(\tau_\theta)$  the direction of the tangent plane to  $\Sigma_1^*$  at  $\phi(\theta)$ . Let us denote by  $H$  the intersection  $\text{Ker } A(X, \theta) \cap T$ . We have

$$\dim(H) = |F_\theta| + |B| - R_\Gamma. \quad (50)$$

*Proof.* Let  $\eta \in T$ . There exists  $h \in \mathbb{R}^{F_\theta} \times \mathbb{R}^B$  such that  $\eta = D\psi^\theta(\tau_\theta) \cdot h$ . We have the following equivalence:

$$\begin{aligned} \eta \in \text{Ker } A(X, \theta) &\iff A(X, \theta) \cdot \eta = 0 \\ &\iff A(X, \theta) \circ D\psi^\theta(\tau_\theta) \cdot h = 0 \\ &\iff \Gamma(X, \theta) \cdot h = 0 \\ &\iff h \in \text{Ker } \Gamma(X, \theta). \end{aligned}$$

This shows that  $D\psi^\theta(\tau_\theta)^{-1}(\text{Ker } A(X, \theta) \cap T) = \text{Ker } \Gamma(X, \theta) \subset \mathbb{R}^{F_\theta} \times \mathbb{R}^B$ .

Since  $D\psi^\theta(\tau_\theta)$  is injective, we thus have

$$\dim(H) = \dim(\text{Ker } \Gamma(X, \theta)) = |F_\theta| + |B| - R_\Gamma.$$

□

**Lemma 30.** Let  $G$  be a supplementary subspace of  $\text{Ker } A(X, \theta)$  such that

$$H \oplus G = \text{Ker } A(X, \theta). \quad (51)$$

If  $R_\Gamma = R_A$ , there exist an open set  $\mathcal{O} \subset U_\theta \times G$  containing  $(\tau_\theta, 0)$  and an open set  $\mathcal{V} \subset \mathbb{R}^{\mathcal{P} \times V_L}$  containing  $\phi(\theta)$  such that

$$\begin{aligned} \xi : \quad \mathcal{O} &\longrightarrow \mathcal{V} \\ (\tau, g) &\longmapsto \psi^\theta(\tau) + g \end{aligned}$$

is a diffeomorphism from  $\mathcal{O}$  onto  $\mathcal{V}$ .

*Proof.* Let us first show that

$$T \oplus G = \mathbb{R}^{\mathcal{P} \times V_L}. \quad (52)$$

Indeed, since  $\text{Ker } A(X, \theta) = H \oplus G$  and  $T \cap \text{Ker } A(X, \theta) = H$ , we have  $T \cap G = \{0\}$ . We of course have

$$T \oplus G \subset \mathbb{R}^{\mathcal{P} \times V_L}. \quad (53)$$

Let us show that  $\dim(G) = \dim(\mathbb{R}^{\mathcal{P} \times V_L}) - \dim(T)$ . First note that we have

$$\dim(\text{Ker } A(X, \theta)) = \dim(\mathbb{R}^{\mathcal{P} \times V_L}) - \text{rank}(A(X, \theta)) = |\mathcal{P}|N_L - R_A. \quad (54)$$

Using (51) and (54), we have

$$\begin{aligned} \dim(G) &= \dim(\text{Ker } A(X, \theta)) - \dim(H) \\ &= |\mathcal{P}|N_L - R_A - \dim(H). \end{aligned}$$

Using (50) and the hypothesis  $R_\Gamma = R_A$  we thus have

$$\begin{aligned} \dim(G) &= |\mathcal{P}|N_L - R_A + R_\Gamma - |F_\theta| - |B| \\ &= |\mathcal{P}|N_L - |F_\theta| - |B| \\ &= |\mathcal{P}|N_L - \dim(T), \end{aligned}$$

where the last equality comes from the injectivity of  $D\psi^\theta(\tau_\theta)$ , shown in Proposition 24. Together with (53), this proves (52).

Let us now consider the function

$$\begin{aligned} \xi : \quad U_\theta \times G &\longrightarrow \mathbb{R}^{\mathcal{P} \times V_L} \\ (\tau, g) &\longmapsto \psi^\theta(\tau) + g. \end{aligned}$$

For all  $(h, g) \in (\mathbb{R}^{F_\theta} \times \mathbb{R}^B) \times G$ , we have

$$D\xi(\tau_\theta, 0) \cdot (h, g) = D\psi^\theta(\tau_\theta)h + g.$$

The differential  $D\xi(\tau_\theta, 0)$  is injective. Indeed, if

$$D\xi(\tau_\theta, 0) \cdot (h, g) = 0,$$

then since  $D\psi^\theta(\tau_\theta)h \in T$  and  $g \in G$ , we have

$$\begin{cases} D\psi^\theta(\tau_\theta)h = 0 \\ g = 0, \end{cases}$$

and since  $D\psi^\theta(\tau_\theta)$  is injective,  $h = 0$  and  $D\xi(\tau_\theta, 0)$  is injective. Since, using (52),

$$\dim(\mathbb{R}^{F_\theta} \times \mathbb{R}^B) + \dim(G) = |\mathcal{P}|N_L,$$

$D\xi(\tau_\theta, 0)$  is bijective.

We can thus apply the inverse function theorem: there exists an open set  $\mathcal{O} \subset U_\theta \times G$  containing  $(\tau_\theta, 0)$ , an open set  $\mathcal{V} \subset \mathbb{R}^{\mathcal{P} \times V_L}$  containing  $\phi(\theta)$  such that  $\xi$  is a diffeomorphism from  $\mathcal{O}$  into  $\mathcal{V}$ .  $\square$

We can now prove the theorems.

*Proof of Theorem 27* If  $C_N$  is not satisfied, then we have  $R_\Gamma = R_A < |F_\theta| + |B|$ . We can thus apply Lemma 30 there exist an open set  $\mathcal{O} \subset U_\theta \times G$  containing  $(\tau_\theta, 0)$  and an open set  $\mathcal{V} \subset \mathbb{R}^{\mathcal{P} \times V_L}$  containing  $\phi(\theta)$  such that

$$\begin{aligned} \xi : \quad \mathcal{O} &\longrightarrow \mathcal{V} \\ (\tau, g) &\longmapsto \psi^\theta(\tau) + g \end{aligned}$$

is a diffeomorphism from  $\mathcal{O}$  onto  $\mathcal{V}$ .

Consider  $\epsilon > 0$ . We define the open set  $\tilde{\mathcal{O}} = \mathcal{O} \cap (\psi^\theta)^{-1}(B(\phi(\theta), \epsilon) \times G)$  and its image  $\tilde{\mathcal{V}} = \xi(\tilde{\mathcal{O}})$ .

Using the computation of  $\dim(H)$  shown in Lemma 29 we have

$$\dim(H) = |F_\theta| + |B| - R_\Gamma > 0,$$

so there exists a nonzero  $w \in H$  such that  $\phi(\theta) + w \in \tilde{\mathcal{V}}$ . Since  $\xi$  induces a diffeomorphism from  $\tilde{\mathcal{O}}$  onto  $\tilde{\mathcal{V}}$ , there exists  $(\tau, g) \in \tilde{\mathcal{O}}$  such that

$$\phi(\theta) + w = \psi^\theta(\tau) + g$$

i.e.

$$\psi^\theta(\tau) - \phi(\theta) = w - g. \quad (55)$$

Let us denote  $\tilde{\theta} = \rho_\theta(\tau)$  and let us show that Theorem 26 ii) does not hold. By definition,  $\phi(\tilde{\theta}) = \psi^\theta(\tau)$  and since  $(\tau, g) \in \tilde{\mathcal{O}}$ ,  $\|\phi(\theta) - \phi(\tilde{\theta})\|_\infty < \epsilon$ . Since  $H \cap G = \{0\}$ ,  $w \in H$ ,  $g \in G$  and  $w \neq 0$ , (55) shows that

$$\phi(\tilde{\theta}) - \phi(\theta) \neq 0.$$

Furthermore, since  $w \in H \subset \text{Ker } A(X, \theta)$  and  $g \in G \subset \text{Ker } A(X, \theta)$ , (55) shows that

$$\phi(\tilde{\theta}) - \phi(\theta) \in \text{Ker } A(X, \theta),$$

so

$$\phi(\tilde{\theta}) \in N(X, \theta).$$

Summarizing, for any  $\epsilon > 0$  there exists  $\tilde{\theta} \in (\mathbb{R}^E \times \mathbb{R}^B) \setminus S$  such that  $\phi(\tilde{\theta}) \in B_\infty(\phi(\theta), \epsilon) \cap \Sigma_1^* \cap N(X, \theta) \setminus \{\phi(\theta)\}$ . The second item of Theorem 26 does not hold. Since it is equivalent, the first item of Theorem 26 does not hold either. In other words, the conclusion of Theorem 27 holds.  $\square$

*Proof of Theorem 28* Suppose that  $C_S$  is satisfied. Using Lemma 29 and using  $C_S$ , we obtain

$$\dim(T \cap \text{Ker } A(X, \theta)) = |F_\theta| + |B| - R_\Gamma = 0.$$

We thus have

$$T \cap \text{Ker } A(X, \theta) = \{0\}. \quad (56)$$

In order to apply Theorem 26 let us show by contradiction that there exists  $\epsilon > 0$  such that

$$B_\infty(\phi(\theta), \epsilon) \cap \Sigma_1^* \cap N(X, \theta) = \{\phi(\theta)\}. \quad (57)$$

More precisely, we suppose that for all  $n \in \mathbb{N}^*$ , there exists  $\phi_n \in N(X, \theta) \cap \Sigma_1^*$  such that  $\phi_n \neq \phi(\theta)$  and  $\|\phi(\theta) - \phi_n\|_\infty < \frac{1}{n}$  and prove that it leads to  $T \cap \text{Ker } A(X, \theta) \neq \{0\}$ , which contradicts (56).

Using Proposition 23 there exists  $n_0 \in \mathbb{N}^*$  such that for all  $n \geq n_0$ , there exists  $\tau_n \in U_\theta$  such that  $\phi_n = \psi^\theta(\tau_n)$ . Since  $\psi^\theta$  is a homeomorphism and  $\psi^\theta(\tau_\theta) = \phi(\theta)$ ,

$$\phi_n \rightarrow \phi(\theta)$$

implies that

$$\tau_n \rightarrow \tau_\theta.$$

Moreover, for all  $n \geq n_0$ ,  $\tau_n \neq \tau_\theta$ .

When  $n$  tends to infinity, we can thus write

$$\phi_n - \phi(\theta) = \psi^\theta(\tau_n) - \psi^\theta(\tau_\theta) = D\psi^\theta(\tau_\theta) \cdot (\tau_n - \tau_\theta) + o(\tau_n - \tau_\theta).$$

Let us apply  $A(X, \theta)$  and divide by  $\|\tau_n - \tau_\theta\|$ .

$$\frac{1}{\|\tau_n - \tau_\theta\|} A(X, \theta) \cdot (\phi_n - \phi(\theta)) = A(X, \theta) \circ D\psi^\theta(\tau_\theta) \cdot \left( \frac{\tau_n - \tau_\theta}{\|\tau_n - \tau_\theta\|} \right) + \frac{1}{\|\tau_n - \tau_\theta\|} A(X, \theta) o(\tau_n - \tau_\theta). \quad (58)$$

Since  $\phi_n \in N(X, \theta)$  for all  $n \in \mathbb{N}^*$ ,

$$\frac{1}{\|\tau_n - \tau_\theta\|} A(X, \theta) \cdot (\phi_n - \phi(\theta)) = 0.$$

Since  $\frac{\tau_n - \tau_\theta}{\|\tau_n - \tau_\theta\|}$  belongs to the unit sphere, we can extract a subsequence that converges to a limit  $h$  with norm equal to 1. Taking the limit in (58) according to this subsequence, we obtain

$$0 = A(X, \theta) \circ D\psi^\theta(\tau_\theta) \cdot h,$$

which shows that  $D\psi^\theta(\tau_\theta) \cdot h \in \text{Ker } A(X, \theta)$ . Since  $h \neq 0$  and  $D\psi^\theta(\tau_\theta)$  is injective,  $D\psi^\theta(\tau_\theta)h \neq 0$  and

$$T \cap \text{Ker } A(X, \theta) \neq \{0\}.$$

This is in contradiction with (56).

We have proven (57). We can now conclude thanks to Lemma 26 there exists  $\epsilon' > 0$  such that for any  $\tilde{\theta} \in \mathbb{R}^E \times \mathbb{R}^B$ , if  $\|\theta - \tilde{\theta}\| < \epsilon'$ , then

$$f_\theta(X) = f_{\tilde{\theta}}(X) \implies \theta \sim \tilde{\theta}.$$

□

## E Checking the conditions numerically

We restate and prove Proposition 12

**Proposition 31.** Let  $X \in \mathbb{R}^{n \times V_0}$  and  $\theta \in \mathbb{R}^E \times \mathbb{R}^B$ . We have

$$R_A = N_L \text{rank}(\alpha(X, \theta)).$$

*Proof.* Let  $\eta \in \mathbb{R}^{P \times V_L}$ . We have

$$A(X, \theta) \cdot \eta = \alpha(X, \theta)\eta.$$

If we denote by  $\eta^1, \dots, \eta^{N_L} \in \mathbb{R}^P$  the  $N_L$  columns of  $\eta$ , the columns of  $A(X, \theta) \cdot \eta$  are  $\alpha(X, \theta)\eta^1, \dots, \alpha(X, \theta)\eta^{N_L}$ . If we consider the matrix  $\eta$  as a family of  $N_L$  vectors of  $\mathbb{R}^P$  and the matrix  $A(X, \theta) \cdot \eta$  as a family of  $N_L$  vectors of  $\mathbb{R}^n$ , the operator  $A(X, \theta)$  can then be equivalently described as

$$\begin{aligned} A(X, \theta) : \quad (\mathbb{R}^P)^{N_L} &\longrightarrow (\mathbb{R}^n)^{N_L} \\ (\eta^1, \dots, \eta^{N_L}) &\longmapsto (\alpha(X, \theta)\eta^1, \dots, \alpha(X, \theta)\eta^{N_L}). \end{aligned}$$

The rank of such an operator is  $N_L \text{rank}(\alpha(X, \theta))$ .

□

We restate and prove Proposition 11

**Proposition 32.** Let  $X \in \mathbb{R}^{n \times V_0}$  and  $\theta \in (\mathbb{R}^E \times \mathbb{R}^B) \setminus (S \cup \Delta_X)$ . The function

$$\begin{aligned} U_\theta &\longrightarrow \mathbb{R}^{n \times V_L} \\ \tau &\longmapsto f_{\rho_\theta(\tau)}(X) \end{aligned}$$

is differentiable in a neighborhood of  $\tau_\theta$ , and we denote by  $D_\tau f_{\rho_\theta(\tau_\theta)}(X)$  its differential at  $\tau_\theta$ . We have

$$D_\tau f_{\rho_\theta(\tau_\theta)}(X) = \Gamma(X, \theta). \quad (59)$$

*Proof.* Using (3) at  $\rho_\theta(\tau)$  and the definition of  $\psi^\theta$  in (11), we have

$$f_{\rho_\theta(\tau)}(X) = A(X, \theta) \cdot \psi^\theta(\tau).$$

Taking the differential of

$$\begin{aligned} U_\theta &\longrightarrow \mathbb{R}^{n \times V_L} \\ \tau &\longmapsto f_{\rho_\theta(\tau)}(X) \end{aligned}$$

at  $\tau_\theta$ , and using (13), we obtain

$$D_\tau f_{\rho_\theta(\tau_\theta)}(X) = A(X, \theta) \circ D\psi^\theta(\tau_\theta) = \Gamma(X, \theta).$$

□

To finish with, the following proposition gives explicit expressions of the coefficients of  $\Gamma(X, \theta)$ . These expressions are given for the sake of theoretical completeness. Note that when it comes to computing  $\Gamma(X, \theta)$  in practice (in order to compute  $R_\Gamma$ ), the correct approach is using backpropagation as described in Section 5 rather than evaluating the expressions in Proposition 33 which involve sums with very large numbers of summands.

**Proposition 33.** If we decompose it in the canonical bases of  $\mathbb{R}^{F_\theta} \times \mathbb{R}^B$  and  $\mathbb{R}^{\llbracket 1, n \rrbracket \times V_L}$ ,  $\Gamma(X, \theta)$  is a  $(nN_L) \times (|F_\theta| + |B|)$  matrix. For lighter notations, let us drop the dependency in  $(X, \theta)$  and denote by  $\gamma^{i, v_L}$  the lines of  $\Gamma(X, \theta)$ , for  $i \in \llbracket 1, n \rrbracket$  and  $v_L \in V_L$ , which satisfy  $(\gamma^{i, v_L})^T \in \mathbb{R}^{F_\theta} \times \mathbb{R}^B$ . For any  $(i, v_L) \in \llbracket 1, n \rrbracket \times V_L$ , let us express the coefficients of  $\gamma^{i, v_L}$ , i.e. express  $\gamma_{v_l \rightarrow v_{l+1}}^{i, v_L}$  for any  $v_l \rightarrow v_{l+1} \in F_\theta$  and express  $\gamma_{v_l}^{i, v_L}$  for any  $v_l \in B$ .

- For any  $l \in \llbracket 0, L-1 \rrbracket$  and any  $(v_l, v_{l+1}) \in V_l \times V_{l+1}$  such that  $v_l \rightarrow v_{l+1} \in F_\theta$ ,

$$\begin{aligned} \gamma_{v_l \rightarrow v_{l+1}}^{i, v_L} = & \sum_{v_0 \in V_0} x_{v_0}^i \bar{w}_{v_0 \rightarrow v_1} \bar{a}_{v_l}(x^i, \theta) \prod_{\substack{1 \leq k \leq L-1 \\ k \neq l}} a_{v_k}(x^i, \theta) w_{v_k \rightarrow v_{k+1}} \\ & \vdots \\ & v_{l-1} \in V_{l-1} \\ & v_{l+2} \in V_{l+2} \\ & \vdots \\ & v_{L-1} \in V_{L-1} \\ & + \sum_{l'=1}^L \sum_{v_{l'} \in V_{l'}} b_{v_{l'}} \bar{a}_{v_l}(x^i, \theta) \prod_{\substack{l' \leq k \leq L-1 \\ k \neq l}} a_{v_k}(x^i, \theta) w_{v_k \rightarrow v_{k+1}}, \quad (60) \\ & \vdots \\ & v_{l-1} \in V_{l-1} \\ & v_{l+2} \in V_{l+2} \\ & \vdots \\ & v_{L-1} \in V_{L-1} \end{aligned}$$

where  $\bar{w}_{v_0 \rightarrow v_1} = w_{v_0 \rightarrow v_1}$  and  $\bar{a}_{v_l}(x^i, \theta) = a_{v_l}(x^i, \theta)$  except when  $l = 0$  in which case  $\bar{w}_{v_0 \rightarrow v_1} = 1$  and  $\bar{a}_{v_l}(x^i, \theta) = 1$ .

- For any  $l \in \llbracket 1, L \rrbracket$  and any  $v_l \in V_l$ ,

$$\begin{aligned} \gamma_{v_l}^{i, v_L} = & \sum_{v_{l+1} \in V_{l+1}} \prod_{l \leq k \leq L-1} a_{v_k}(x^i, \theta) w_{v_k \rightarrow v_{k+1}}. \quad (61) \\ & \vdots \\ & v_{L-1} \in V_{L-1} \end{aligned}$$

*Proof.* Let  $(i, v_L) \in \llbracket 1, n \rrbracket \times V_L$ .

Let us compute  $\gamma_{v_l \rightarrow v_{l+1}}^{i, v_L}$ , for  $l \in \llbracket 0, L-1 \rrbracket$  and  $(v_l, v_{l+1}) \in V_l \times V_{l+1}$  such that  $v_l \rightarrow v_{l+1} \in F_\theta$ .  $\gamma_{v_l \rightarrow v_{l+1}}^{i, v_L}$  is the coefficient corresponding to the line  $(i, v_L)$  and the column  $(v_l \rightarrow v_{l+1})$  of  $\Gamma(X, \theta)$ . Let us denote by  $h^{v_l \rightarrow v_{l+1}} \in \mathbb{R}^{F_\theta} \times \mathbb{R}^B$  the vector whose component indexed by  $v_l \rightarrow v_{l+1}$  is equal to 1 and whose other components are zero. Let us denote by  $d^{i, v_L} \in \mathbb{R}^{n \times V_L}$  the element whose component indexed by  $(i, v_L)$  is equal to 1 and whose other components are zero. Let us denote by  $\langle \cdot, \cdot \rangle_{\mathbb{R}^{n \times V_L}}$  the scalar product of the euclidean space  $\mathbb{R}^{n \times V_L}$ . We have

$$\begin{aligned} \gamma_{v_l \rightarrow v_{l+1}}^{i, v_L} &= \left\langle d^{i, v_L}, \Gamma(X, \theta) \cdot h^{v_l \rightarrow v_{l+1}} \right\rangle_{\mathbb{R}^{n \times V_L}} \\ &= \left\langle d^{i, v_L}, A(X, \theta) \circ D\psi^\theta(\tau_\theta) \cdot h^{v_l \rightarrow v_{l+1}} \right\rangle_{\mathbb{R}^{n \times V_L}} \\ &= \left\langle d^{i, v_L}, A(X, \theta) \cdot \frac{\partial \psi^\theta}{\partial \tau_{v_l \rightarrow v_{l+1}}}(\tau_\theta) \right\rangle_{\mathbb{R}^{n \times V_L}} \\ &= \left\langle d^{i, v_L}, \alpha(X, \theta) \frac{\partial \psi^\theta}{\partial \tau_{v_l \rightarrow v_{l+1}}}(\tau_\theta) \right\rangle_{\mathbb{R}^{n \times V_L}} \\ &= \left[ \alpha(X, \theta) \frac{\partial \psi^\theta}{\partial \tau_{v_l \rightarrow v_{l+1}}}(\tau_\theta) \right]_{i, v_L}, \end{aligned}$$

where  $\left[ \alpha(X, \theta) \frac{\partial \psi^\theta}{\partial \tau_{v_l \rightarrow v_{l+1}}}(\tau_\theta) \right]_{i, v_L}$  denotes the coefficient  $(i, v_L)$  of the product  $\alpha(X, \theta) \frac{\partial \psi^\theta}{\partial \tau_{v_l \rightarrow v_{l+1}}}(\tau_\theta)$ . Let us remind the dimensions in this product. For the left factor, recalling the definition given in the beginning of Section [D](#) we have  $\alpha(X, \theta) \in \mathbb{R}^{n \times \mathcal{P}}$ . Concerning the right factor, since for any  $\tau \in U_\theta$ , we have  $\psi^\theta(\tau) \in \mathbb{R}^{\mathcal{P} \times V_L}$ , the partial derivative satisfies  $\frac{\partial \psi^\theta}{\partial \tau_{v_l \rightarrow v_{l+1}}}(\tau_\theta) \in \mathbb{R}^{\mathcal{P} \times V_L}$ . Hence, the dimension of the product is

$$\alpha(X, \theta) \frac{\partial \psi^\theta}{\partial \tau_{v_l \rightarrow v_{l+1}}}(\tau_\theta) \in \mathbb{R}^{n \times V_L}.$$

To obtain the coefficient  $(i, v_L)$  of this product, we keep the  $i^{th}$  line of the left factor, which is equal to  $\alpha(x^i, \theta)$ , and the column  $v_L$  of the right factor, which is equal to  $\frac{\partial \psi_{v_L}^\theta}{\partial \tau_{v_l \rightarrow v_{l+1}}}(\tau_\theta)$ . We thus have

$$\left[ \alpha(X, \theta) \frac{\partial \psi^\theta}{\partial \tau_{v_l \rightarrow v_{l+1}}}(\tau_\theta) \right]_{i, v_L} = \alpha(x^i, \theta) \frac{\partial \psi_{v_L}^\theta}{\partial \tau_{v_l \rightarrow v_{l+1}}}(\tau_\theta) = \sum_{p \in \mathcal{P}} \alpha_p(x^i, \theta) \frac{\partial \psi_{p, v_L}^\theta}{\partial \tau_{v_l \rightarrow v_{l+1}}}(\tau_\theta).$$

Let  $p \in \mathcal{P}$ . If  $p = (v_0, \dots, v_L) \in \mathcal{P}_0$ , looking at the case 1 in the proof of Proposition [24](#), we have

$$\frac{\partial \psi_{p, v_L}^\theta}{\partial \tau_{v_l \rightarrow v_{l+1}}}(\tau_\theta) = \mathbf{1}_{\{v_l \rightarrow v_{l+1} \in p\}} \prod_{\substack{k \in \llbracket 0, L-1 \rrbracket \\ k \neq l}} w_{v_k \rightarrow v_{k+1}}.$$

Recalling the definition of  $\alpha_p(x^i, \theta)$  in the case  $p \in \mathcal{P}_0$ , given in [\(2\)](#), we also have

$$\alpha_p(x^i, \theta) = x_{v_0}^i \prod_{k=1}^{L-1} a_{v_k}(x^i, \theta),$$

and thus

$$\alpha_p(x^i, \theta) \frac{\partial \psi_{p, v_L}^\theta}{\partial \tau_{v_l \rightarrow v_{l+1}}}(\tau_\theta) = \mathbf{1}_{\{v_l \rightarrow v_{l+1} \in p\}} x_{v_0}^i \prod_{k=1}^{L-1} a_{v_k}(x^i, \theta) \prod_{\substack{k \in \llbracket 0, L-1 \rrbracket \\ k \neq l}} w_{v_k \rightarrow v_{k+1}}. \quad (62)$$

Now if  $p = (v_{l'}, \dots, v_L) \in \mathcal{P}_{l'}$ , for  $l' \in \llbracket 1, \dots, L-1 \rrbracket$ , looking at the case 2 in the proof of Proposition [24](#), we have

$$\frac{\partial \psi_{p, v_L}^\theta}{\partial \tau_{v_l \rightarrow v_{l+1}}}(\tau_\theta) = \mathbf{1}_{\{v_l \rightarrow v_{l+1} \in p\}} b_{v_{l'}} \prod_{\substack{k \in \llbracket l', L-1 \rrbracket \\ k \neq l}} w_{v_k \rightarrow v_{k+1}}.$$

Recalling the definition of  $\alpha_p(x^i, \theta)$  in the case  $p \in \mathcal{P}_{l'}$ , given in (2), we also have

$$\alpha_p(x^i, \theta) = \prod_{k=l'}^{L-1} a_{v_k}(x^i, \theta),$$

and thus

$$\alpha_p(x^i, \theta) \frac{\partial \psi_{p, v_L}^\theta}{\partial \tau_{v_l \rightarrow v_{l+1}}}(\tau_\theta) = \mathbf{1}_{\{v_l \rightarrow v_{l+1} \in p\}} b_{v_{l'}} \prod_{k=l'}^{L-1} a_{v_k}(x^i, \theta) \prod_{\substack{k \in [l', L-1] \\ k \neq l}} w_{v_k \rightarrow v_{k+1}}. \quad (63)$$

Finally, if  $p = \beta$ , looking at the case 3 in the proof of Proposition 24 we have

$$\frac{\partial \psi_{p, v_L}^\theta}{\partial \tau_{v_l \rightarrow v_{l+1}}}(\tau_\theta) = 0,$$

and thus

$$\alpha_p(x^i, \theta) \frac{\partial \psi_{p, v_L}^\theta}{\partial \tau_{v_l \rightarrow v_{l+1}}}(\tau_\theta) = 0. \quad (64)$$

Assembling (62), (63) and (64), we can sum over all  $p \in \mathcal{P}$ , and obtain

$$\begin{aligned} \gamma_{v_{l+1} \rightarrow v_l}^{i, v_L} = & \sum_{\substack{p \in \mathcal{P}_0 \\ p = (v_0, \dots, v_{L-1})}} \mathbf{1}_{\{v_l \rightarrow v_{l+1} \in p\}} x_{v_0}^i \prod_{k=1}^{L-1} a_{v_k}(x^i, \theta) \prod_{\substack{k \in [0, L-1] \\ k \neq l}} w_{v_k \rightarrow v_{k+1}} \\ & + \sum_{l'=1}^L \sum_{\substack{p \in \mathcal{P}_{l'} \\ p = (v_{l'}, \dots, v_{L-1})}} \mathbf{1}_{\{v_l \rightarrow v_{l+1} \in p\}} b_{v_{l'}} \prod_{k=l'}^{L-1} a_{v_k}(x^i, \theta) \prod_{\substack{k \in [l', L-1] \\ k \neq l}} w_{v_k \rightarrow v_{k+1}} \end{aligned}$$

which can be reformulated, getting rid of the zero sums when  $v_l \rightarrow v_{l+1} \notin p$ , as

$$\begin{aligned} \gamma_{v_{l+1} \rightarrow v_l}^{i, v_L} = & \sum_{\substack{v_0 \in V_0 \\ \vdots \\ v_{l-1} \in V_{l-1} \\ v_{l+2} \in V_{l+2} \\ \vdots \\ v_{L-1} \in V_{L-1}}} x_{v_0}^i \overline{w}_{v_0 \rightarrow v_1} a_{v_l}(x^i, \theta) \prod_{\substack{k \in [1, L-1] \\ k \neq l}} a_{v_k}(x^i, \theta) w_{v_k \rightarrow v_{k+1}} \\ & + \sum_{l'=1}^L \sum_{\substack{v_{l'} \in V_{l'} \\ \vdots \\ v_{l-1} \in V_{l-1} \\ v_{l+2} \in V_{l+2} \\ \vdots \\ v_{L-1} \in V_{L-1}}} a_{v_l}(x^i, \theta) b_{v_{l'}} \prod_{\substack{k \in [l', L-1] \\ k \neq l}} a_{v_k}(x^i, \theta) w_{v_k \rightarrow v_{k+1}}, \end{aligned}$$

which shows (60).

The proof of (61) is similar to the one of (60). □
